# Supplementary material for: Cryo-EM structures reveal specialization at the myosin VI-actin interface and a mechanism of force sensitivity
Source: eLife journal article supplement (doi:10.7554/elife.31125), 2017-12-04

A)

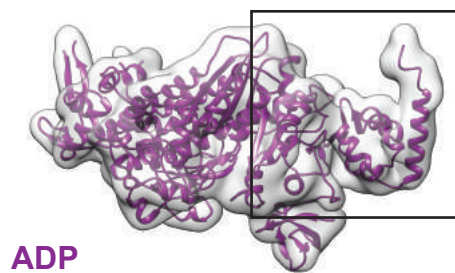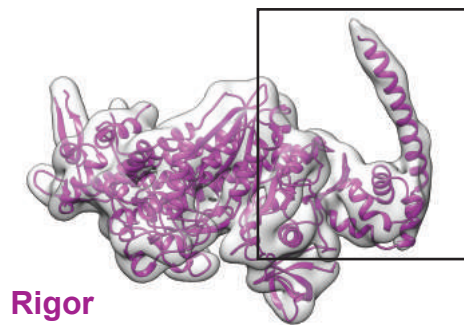

B)

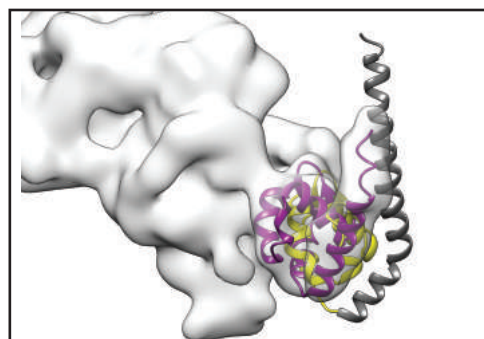

ADP Density  
ADP Converter and Lever Arm  
Rigor Converter  
Rigor Lever Arm

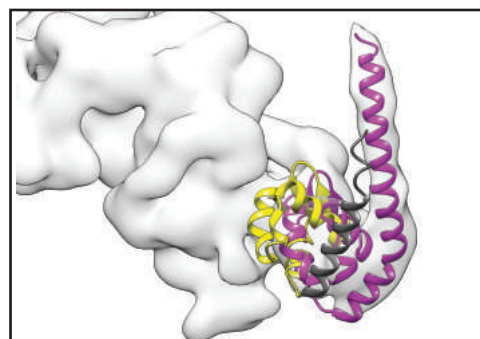

Rigor Density  
Rigor Converter and Lever Arm  
ADP Converter  
ADP Lever Arm

90°  
↺  
↻

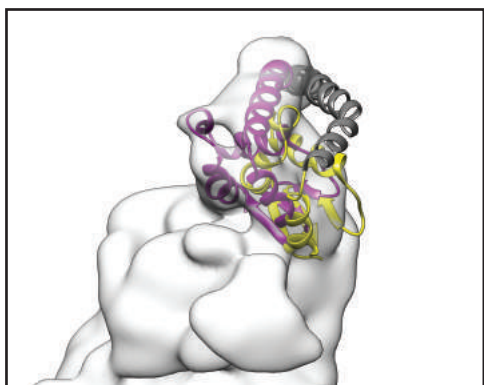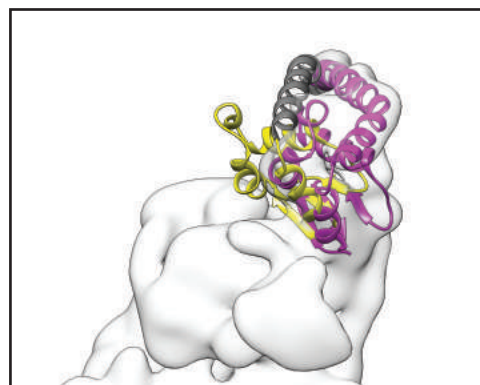

C)

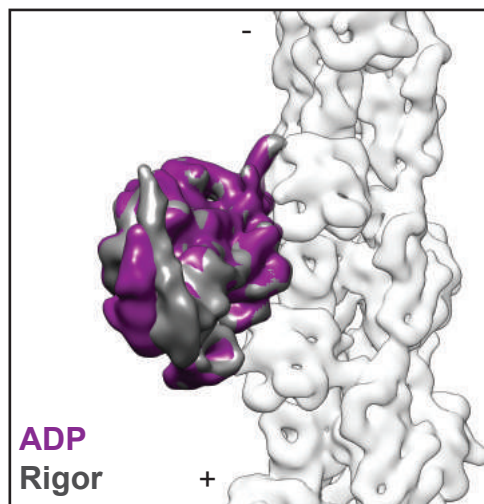

Supplement: supp [file elife-31125-supp-v1.zip]
