# Supplementary material for: Cryo-EM structures reveal specialization at the myosin VI-actin interface and a mechanism of force sensitivity
Source: eLife journal article supplement (doi:10.7554/elife.31125), 2017-12-04
Supplement: supp [file elife-31125-supp-v1.zip]

Archive with 25 entries (25 files):
- elife_poa_e31125_Figure_6_figure_supplement_1.pdf
- elife_poa_e31125_Figure_3_figure_supplement_2.pdf
- elife_poa_e31125_Figure_7_source_data_1.txt
- elife_poa_e31125_Figure_3_figure_supplement_1.pdf
- elife_poa_e31125_Figure_1_figure_supplement_1.pdf
- elife_poa_e31125_Movie_5.mov
- elife_poa_e31125_Figure_5_figure_supplement_2.pdf
- elife_poa_e31125_Movie_1.mp4
- elife_poa_e31125_Figure_3_figure_supplement_5.pdf
- elife_poa_e31125_Movie_4.mov
- elife_poa_e31125_Figure_7_source_data_2.txt
- elife_poa_e31125_Figure_5_figure_supplement_1.pdf
- elife_poa_e31125_Figure_2_figure_supplement_1.pdf
- elife_poa_e31125_Figure_3_figure_supplement_6.pdf
- elife_poa_e31125_Movie_6.mov
- elife_poa_e31125_Figure_3_figure_supplement_4.pdf
- elife_poa_e31125_Movie_7.mp4
- elife_poa_e31125_Movie_8.mov
- elife_poa_e31125_Figure_4_figure_supplement_1.pdf
- elife_poa_e31125_Figure_6_figure_supplement_2.pdf
- elife_poa_e31125_Transparent_Reporting_File.docx
- elife_poa_e31125_Movie_3.mov
- elife_poa_e31125_Movie_2.mp4
- elife_poa_e31125_Figure_3_figure_supplement_3.pdf
- elife_poa_e31125_Figure_5_figure_supplement_3.pdf
