# Supplementary material for: Cryo-EM structures reveal specialization at the myosin VI-actin interface and a mechanism of force sensitivity
Source: eLife journal article supplement (doi:10.7554/elife.31125), 2017-12-04
Supplement: supp [file elife-31125-supp-v1.zip › elife_poa_e31125_Figure_7_source_data_1.txt]

>MyoVI_hires_structure_homo_sapiens
EDGKPVWAPXPTDGFQVGNIVDIGPDSLTIEPLNQKGKTFLALINQVFPAEEDSKKDVEDNCSLMYLNEATLLXNIKVRY
SKDRIYTYVANILIAVNPYFDIPKIYSSETIKSYQGKSLGTMPPXVFAIADKAFRDMKVLKLSQSIIVSGESGAGKTENT
KFVLRYLTESYGTGQDIDDRIVEANPLLEAFGNAKTVRNNNSSRFGKFVEIXFNEKSSVVGGFVSXYLLEKSRICVQGKE
ERNYXIFYRLCAGASEDIRERLXLSSPDNFRYLNRGCTRYFANKETDKQILQNRKSPEYLKAGSLKDPLLDDXGDFIRMC
TAMKKIGLDDEEKLDLFRVVAGVLXLGNIDFEEAGSTSGGCNLKNKSTQALEYCAELLGLDQDDLRVSLTTRVMLTTAGG
AKGTVIKVPLKVEQANNARDALAKTVYSXLFDXVVNRVNQCFPFETSSYFIGVLDIAGFEYFEXNSFEQFCINYCNEKLQ
QFFNERILKEEQELYQKEGLGVNEVXYVDNQDCIDLIEARLVGILDILDEENRLPQPSDQXFTSAVXQKXKDXFRLSIPR
KSKLAIXRNIRDDEGFIIRXFAGAVCYETTQFVEKNNDALXMSLESLICESRDKFIRELFESSTNNNKDTKQKAGKLSFI
SVGNKFKTQLNLLLDKLRSTGASFIRCIKPNLKMTSXXFEGAQILSQLQCSGMVSVLDLMQGGF
>NP_999186.1 unconventional myosin-VI [Sus scrofa]
EDGKPVWAPHPTDGFQVGNIVDIGPDSLTIEPLNQKGKTFLALINQVFPAEEDSKKDVEDNCSLMYLNEATLLHNIKVRY
SKDRIYTYVANILIAVNPYFDIPKIYSSETIKSYQGKSLGTMPPHVFAIADKAFRDMKVLKLSQSIIVSGESGAGKTENT
KFVLRYLTESYGTGQDIDDRIVEANPLLEAFGNAKTVRNNNSSRFGKFVEIHFNEKSSVVGGFVSHYLLEKSRICVQGKE
ERNYHIFYRLCAGASEDIRERLHLSSPDNFRYLNRGCTRYFANKETDKQILQNRKSPEYLKAGSLKDPLLDDHGDFIRMC
TAMKKIGLDDEEKLDLFRVVAGVLHLGNIDFEEAGSTSGGCNLKNKSTQALEYCAEKLLGLDQDDLRVSLTTRVMLTTAG
GAKGTVIKVPLKVEQANNARDALAKTVYSHLFDHVVNRVNQCFPFETSSYFIGVLDIAGFEYFEHNSFEQFCINYCNEKL
QQFFNERILKEEQELYQKEGLGVNEVHYVDNQDCIDLIEARLVGILDILDEENRLPQPSDQHFTSAGHQKHKDHFRLSIP
RKSKLAIHRNIAYDEGFIIRHFAGAVCYETTQFVEKNNDALHMSLESLICESRDKFIRELFESSTNNNKDTKQKAGKLSF
ISVGNKFKTQLNLLLDKLRSTGASFIRCIKPNLKMTSHHFEGAQILSQLQCSGMVSVLDLMQGGF
>EPQ04756.1 Myosin-VI [Myotis brandtii]
EDGKPVWAPHPTDGFQMGNIVDIGPDSLTIEPLNQKGKTFLALINQVFPAEEDSKKDVEDNCSLMYLNEATLLHNIKVRY
SKDRIYTYVANILIAVNPYFDIPKIYSSETIKSYQGKSLGTMPPHVFAIADKAFRDMKVLKMSQSIIVSGESGAGKTENT
KFVLRYLTESYGTGQDIDERIVEANPLLEAFGNAKTVRNNNSSRFGKFVEIHFNEKSSVVGGFVSHYLLEKSRICVQGKE
ERNYHIFYRLCAGASEDIREKLHLSSPDNFRYLNRGCTRYFANKETDKQILQNRKSPEYLKAGSLKDPLLDDHGDFIRMC
TAMKKIGLDDEEKLDLFRVVAGVLHLGNIDFEEAGSTSGGCNLKNKSTQSLEYCAELLGLDQDDLRVSLTTRVMLTTAGG
TKGTVIKVPLKVEQANNARDALAKTVYSHLFDHVVNRVNQCFPFETSSYFIGVLDIAGFEYFEHNSYEQFCINYCNEKLQ
QFFNERILKEEQELYQKEGLGVNEVHYVDNQDCIDLVEAKLVGILDILDEENRLPQPSDQHFTSAVHQKHKEHFRLTIPR
KSKLAIHRNIRDDEGFIIRHFAGAVCYETTQFVEKNNDALHMSLESLICESRDKFIRELFETSTNNNKDTKQKAGKLGFI
SVGNKFKTQLNLLLDKLRSTGASFIRCIKPNLKMTSHDFEGAQILSQLQCSGMVSVLDLMQGGF
>ELK23909.1 Myosin-VI [Myotis davidii]
EDGKPVWAPHPTDGFQMGNIVDIGPDSLTIEPLNQKGKTFLALINQVFPAEEDSKKDVEDNCSLMYLNEATLLHNIKVRY
SKDRIYTYVANILIAVNPYFDIPKIYSSETIKSYQGKSLGTMPPHVFAIADKAFRDMKVLKMSQSIIVSGESGAGKTENT
KFVLRYLTESYGTGQDIDDRIVEANPLLEAFGNAKTVRNNNSSRFGKFVEIHFNEKSSVVGGFVSHYLLEKSRICVQGKE
ERNYHIFYRLCAGASEDIREKLHLSSPDNFRYLNRGCTRYFANKETDKQISQNRKSPEYLKAGSLKDPLLDDHGDFIRMC
TAMKKIGLDDEEKLDLFRVVAGVLHLGNIDFEEAGSTSGGCNLKNKSTQSLEYCAELLGLDQDDLRVSLTTRVMLTTAGG
TKGTVIKVPLKVEQANNARDALAKTVYSHLFDHVVNRVNQCFPFETSSYFIGVLDIAGFEYFEHNSYEQFCINYCNEKLQ
QFFNERILKEEQELYQKEGLGVNEVHYVDNQDCIDLVEAKLVGILDILDEENRLPQPSDQHFTSAVHQKHKDHFRLTIPR
KSKLAIHRNIRDDEGFVIRHFAGAVCYETTQFVEKNNDALHMSLESLICESRDKFIRELFETSTNNNKDTKQKAGKLGFI
SVGNKFKTQLNLLLDKLRSTGASFIRCIKPNLKMTSHDFEGAQILSQLQCSGMVSVLDLMQGGF
>AAK00229.1 myosin VI [Homo sapiens]
EDGKPVWAPHPTDGFQMGNIVDIGPDSLTIEPLNQKGKTFLALINQVFPAEEDSKKDVEDNCSLMYLNEATLLHNIKVRY
SKDRIYTYVANILIAVNPYFDIPKIYSSEAIKSYQGKSLGTRPPHVFAIADKAFRDMKVLKMSQSIIVSGESGAGKTENT
KFVLRYLTESYGTGQDIDDRIVEANPLLEAFGNAKTVRNNNSSRFGKFVEIHFNEKSSVVGGFVSHYLLEKSRICVQGKE
ERNYHIFYRLCAGASEDIREKLHLSSPDNFRYLNRGCTRYFANKETDKQILQNRKSPEYLKAGSMKDPLLDDHGDFIRMC
TAMKKIGLDDEEKLDLFRVVAGVLHLGNIDFEEAGSTSGGCNLKNKSAQSLEYCAELLGLDQDDLRVSLTTRVMLTTAGG
TKGTVIKVPLKVEQANNARDALAKTVYSHLFDHVVNRVNQCFPFETSSYFIGVLDIAGFEYFEHNSFEQFCINYCNEKLQ
QFFNERILKEEQELYQKEGLGVNEVHYVDNQDCIDLIEAKLVGILDILDEENRLPQPSDQHFTSAVHQKHKDHFRLTIPR
KSKLAVHRNIRDDEGFIIRHFAGAVCYETTQFVEKNNDALHMSLESLICESRDKFIRELFESSTNNNKDTKQKAGKLSFI
SVGNKFKTQLNLLLDKLRSTGASFIRCIKPNLKMTSHHFEGAQILSQLQCSGMVSVLDLMQGGY
>NP_001193001.1 unconventional myosin-VI [Bos taurus]
EDGRPVWAPHPTEGFQMGNIVDIGPDSLTIEPLGQKGKTFLALINQVFPAEEDSKKDVEDNCSLMYLNEATLLHNIKVRY
SKDRIYTYVANILIAVNPYFDIPKIYSSDSIKSYQGKSLGTMPPHVFAIADKAFRDMKVLKMSQSIIVSGESGAGKTENT
KFVLRYLTESYGSGQDIDDRIVEANPLLEAFGNAKTVRNNNSSRFGKFVEIHFNEKSSVVGGFVSHYLLEKSRICVQGKE
ERNYHIFYRLCAGASEDIRERLHLSSPDNFRYLNRGCTRYFANKETDKQILQNRKTPEHLKAGSLKDPLLDDHGDFVRMC
TAMKKIGLDDEEKLDLFRVVAGVLHLGNIDFEEAGSTSGGCNLKNKSTQSLEYCAELLGLDQDDLRVSLTTRVMLTTAGG
TKGTVIKVPLKVEQANNARDALAKTVYSHLFDHVVNRVNQCFPFETSSYFIGVLDIAGFEYFEHNSFEQFCINYCNEKLQ
QFFNERILKEEQELYQKEGLGVNEVHYVDNQDCIDLIEAKLMGILDILDEENRLPQPSDQHFTSAVHQKHKDHFRLSIPR
KSKLAVHRNIRDDEGFIVRHFAGAVCYETTQFVEKNNDALHMSLESLICESRDKFIRELFESSTNNNKDTKQKAGKLSFI
SVGNKFKTQLNLLLDKLRSTGASFIRCIKPNLKMTSHDFEGAQILSQLQCSGMVSVLDLMQGGF
>EHA97766.1 Myosin-VI [Heterocephalus glaber]
EDGKPVWAPHPTDGFQMGNIVDIGPDSLTIEPLNQKGKTFLALINQVFPAEEDSKKDVEDNCSLMYLNEATLLHNIKVRY
SKDRIYTYVANILIAVNPYFDIPKIYSSDTIKSYQGKSLGTMPPHVFAVADKAFRDMKVLRMSQSVIVSGESGAGKTENT
KFVLRYLTESYGTGQDIDDRIVEANPLLEAFGNAKTVRNNNSSRFGKFVEIHFNEKSSVVGGFVSHYLLEKSRICVQGKE
ERNYHIFYRLCAGASEDIREKLHLSSPDNFRYLNRGCTRYFANKETDKQISQNRKSPEYLKAGSLKDPLLDDHGDFIRMC
TAMKKIGLGDEEKLDLFRVVAGVLHLGNIDFEEAGSTSGGCNLKNRSTQSLEYCAELLGLDQDDLRVSLTTRVMLTTAGG
TKGTVIKVPLKVEQANNARDALAKTVYSHLFDHVVNRVNQCFPFETSSYFIGVLDIAGFEYFEHNSFEQFCINYCNEKLQ
QFFNERILKEEQELYQKEGLGVNEVHYVDNQDCIDLIEAKLVGILDILDEENRLPQPSDQHFTSAVHQKHKDHFRLTIPR
KSKLAVHRNLRDDEGFIIRHFAGAVCYETTQFVEKNNDALHMSLESLICESRDKFIRELFESSTNNNKDTKQKAGKLSFI
SVGNKFKTQLNLLLDKLRSTGASFIRCIKPNLKMTSHHFEGAQILSQLQCSGMVSVLDLMQGGF
>NP_001098006.1 unconventional myosin-VI [Macaca mulatta]
EDGKPVWAPHPTDGFQMGNIVDIGPDSLTIEPLNQKGKTFLALINQVFPAEEDSKKDVEDNCSLMYLNEATLLHNIKVRY
SKDRIYTYVANILIAVNPYFDIPKIYSSETIKSYQGKSLGTRPPHVFAIADKAFRDMKVLKMSQSIIVSGESGAGKTENT
KFVLRYLTESYGTGQDIDDRIVEANPLLEAFGNAKTVRNNNSSRFGKFVEIHFNEKNSVVGGFVSHYLLEKSRICVQGKE
ERNYHIFYRLCAGASEDIREKLHLSSPDNFRYLNRGCTRYFANKETDKQILQNRKSPEYLKAGSMKDPLLDDHGDFIRMC
TAMKKIGLDDEEKLDLFRVVAGVLHLGNIDFEEAGSTSGGCNLKNKSAQSLECCAELLGLDQDDLRVSLTTRVMLTTAGG
TKGTVIKVPLKVEQANNARDALAKTVYSHLFDHVVNRVNQCFPFETSSYFIGVLDIAGFEYFEHNSYEQFCINYCNEKLQ
QFFNERILKEEQELYQKEGLGVNEVHYVDNQDCIDLIEAKLVGILDILDEENRLPQPSDQHFTSAVHQKHKDHFRLTIPR
KSKLAVHRNIRDDEGFIIRHFAGAVCYETTQFVEKNNDALHMSLESLICESRDKFIRELFESSTNNNKDTKQKAGKLSFI
SVGNKFKTQLNLLLDKLRSTGASFIRCIKPNLKMTSHHFEGAQILSQLQCSGMVSVLDLMQGGF
>NP_001034635.2 unconventional myosin-VI [Mus musculus]
EDGKPVWAPHPTDGFQMGNIVDIGPDSLTIEPLNQKGKTFLALINQVFPAEEDSKKDVEDNCSLMYLNEATLLHNVKVRY
SKDRIYTYVANILIAVNPYFDIPKIYSSDTIKSYQGKSLGTMPPHVFAIADKAFRDMKVLKMSQSIIVSGESGAGKTENT
KFVLRYLTESYGTGQDIDDRIVEANPLLEAFGNAKTVRNNNSSRFGKFVEIHFNEKSSVVGGFVSHYLLEKSRICVQGKE
ERNYHIFYRLCAGASEDIREKLHLSSPDNFRYLNRGCTRFFANKETDKQILQNRKSPEYVKAGSLKDPLLDDHGDFIRMC
TAMKKIGLDDEEKLDLFRVVAGVLHLGNIDFEEAGSTSGGCNLKNKSAPSLEYCAELLGLDQDDLRVSLTTRVMLTTAGG
TKGTVIKVPLKVEQANNARDALAKTVYSHLFDHVVNRVNQCFPFETSSYFIGVLDIAGFEYFEHNSFEQFCINYCNEKLQ
QFFNERILKEEQELYQKEGLGVNEVHYVDNQDCIDLIEVKLVGILDILDEENRLPQPSDQHFTSVVHQKHKDHFRLTIPR
KSKLAVHRNLRDDEGFIIRHFAGAVCYETTQFVEKNNDALHMSLESLICESRDKFIRALFESSTNNNKDTKQKAGKLSFI
SVGNKFKTQLNLLLDKLRSTGASFIRCIKPNLKMTSHHFEGAQILSQLQCSGMVSVLDLMQGGF
>ELK00133.1 Myosin-VI [Pteropus alecto]
EDGKPVWAPHPTDGFQMGNIVDIGPDSLTIEPLNQKGKTFLALINQVFPAEEDSKKDVEDNCSLMYLNEATLLHNIKVRY
SKDRIYTYVANILIAVNPYFDIPKIYSSEAIKSYQGKSLGTMPPHVFAIADKAFRDMKVLKMSQSVIVSGESGAGKTENT
KFVLRYLTESYGTGQDIDDRIVEANPLLEAFGNAKTVRNNNSSRFGKFVEIHFNEKSSVVGGFVSHYLLEKSRICVQGKE
ERNYHIFYRLCAGASEDIREKLHLSSPDNFRYLNRGCTRYFANKETDKQILQNRKTPEHLKAGSLKDPLLDDHGDFIRMC
TAMKKIGLDDNEKLDLFRVVAGVLHLGNIDFEEAGSTSGGCTLKNKSSQSLEYCAELLGLDQDDLRVSLTTRVMLTTAGG
TKGTVIKVPLKVEQANNARDALAKTVYSHLFDHVVNRVNQCFPFETSSYFIGVLDIAGFEYFEHNSFEQFCINYCNEKLQ
QFFNERILKEEQELYQKEGLGVNEVHYVDNQDCIDLVESKLVGILDILDEESRLPQPSDQHFTSAVHQKHKDHFRLTVPR
KSKLAVHRNLRDDEGFIIRHFAGAVCYETTQFVEKNNDALHMSLESLICESRDKFIRELFESSTNNNKDTKQKAGKLSFI
SVGNKFKTQLNLLLDKLRSTGASFIRCIKPNLKMVGHHFEGAQILSQLQCSGMVSVLDLMQGGF
>ERE74549.1 myosin-VI-like protein [Cricetulus griseus]
EDGKPVWAPHPTDGFQMGNIVDIGPDSLTIEPLNQKGKTFLALINQVFPAEEDSKKDVEDNCSLMYLNEATLLHNVKVRY
SKDRIYTYVANILIAVNPYFDIPKIYTSDTIKSYQGKSLGTMPPHVFAIADKAFRDMKVLKMSQSIIVSGESGAGKTENT
KFVLRYLTESYGTGQDIDDRIVEANPLLEAFGNAKTVRNNNSSRFGKFVEIHFNEKSSVVGGFVSHYLLEKSRICVQGKE
ERNYHIFYRLCAGASEDIREKLHLSSPDNFRYLNRGCTRYFANKETDKQILQNRKSPEYVKAGSLKDPLLDDHGDFIRMC
TAMKKIGLDDEEKLDLFRVVAGVLHLGNIDFEEAGSTSGGCNLKNKSAPSLEYCAELLGLDQDDLRVSLTTRVMLTTAGG
TKGTVIKVPLKVEQANNARDALAKTVYSHLFDHVVNRVNQCFPFETSSYFIGVLDIAGFEYFEHNSFEQFCINYCNEKLQ
QFFNERILKEEQELYQKEGLGVNEVHYVDNQDCIDLIEVKLVGILDILDEENRLPQPSDQHFTSVVHQKHKDHFRLTIPR
KSKLAVHRNLRDDEGFIIRHFAGAVCYETTQFVEKNNDALHMSLESLICESRDKFIRALFESSTNNNKDTKQKAGKLSFI
SVGNKFKTQLNLLLDKLRSTGASFIRCIKPNLKMTSHHFEGTQILSQLQCSGMVSVLDLMQGGF
>AGB93865.1 myosin VI, partial [Leptonycteris yerbabuenae]
APHPTDGFQMGNIVDIGPDSLTIEPLDQKGKTFLALINQVFPAEEDSKKDVEDNCSLMYLNEATLLHNIKVRYSKDRIYT
YVANILIAVNPYFDIPKIYSSETIKSYQGKSLGTMPPHVFAIADKAFRDMKVLKMSQSIIVSGESGAGKTENTKFVLRYL
TESYGTGQDIDDRIVEANPLLEAFGNAKTVRNNNSSRFGKFVEIHFNEKSSVVGGFVSHYLLEKSRICVQGKEERNYHIF
YRLCAGASEDIREKLHLSSPDNFRYLNRGCTRYFANKETDKQILQNRRSPEYLKAGSLKDPLLDDHGDFIRMCTAMKKIG
LDDEEKLDLFRVVAGVLHLGNIDFEEAGSTSGGCNLKNKSTQSLEYCAELLGLDQDDLRVSLTTRVMLTTAGGTKGTVIK
VPLKVEQANNARDALAKTVYSHLFDHVVNRVNQCFPFETSSYFIGVLDIAGFEYFEHNSFEQFCINYCNEKLQQFFNERI
LKEEQELYQKEGLGVNEVHYVDNQDCIDLIEAKLVGILDILDEENRLPQPSDQHFTSAVHQKHKDHFRLTIPRKSKLAVH
RNIRDDEGFIVRHFAGAVCYETTQFVEKNNDALHMSLESLICESRDKFIRELFESSTNNNKDTKQKAGKLSFISVGNKFK
TQLNLLLDKLRSTGASFIRCIKPNLKMTSHHFEGAQILSQLQCSGMVSVLDLMQGGF
>AGB93874.1 myosin VI, partial [Chaerephon plicatus]
APHPTDGFQMGNIVDIGPDSLTIEPLNQKGKTFLALINQVFPAEEDSKKDVEDNCSLMYLNEATLLHNIKVRYSKDRIYT
YVANILIAVNPYFDIPKIYSSETIKSYQGKSLGTMPPHVFAIADKAFRDMKVLKMSQSIIVSGESGAGKTENTKFVLRYL
TESYGTGQDIDDRIVEANPLLEAFGNAKTVRNNNSSRFGKFVEIHFNEKSSVVGGFVSHYLLEKSRICVQGKEERNYHIF
YRLCAGASEDIREKLHLNSPDNFRYLNRGCTRYFANKETDKQILQNRKSPEYLKAGSLKDPLLDDHGDFIRMCTAMKKIG
LDDEEKLDLFRVVAGVLHLGNIDFEEAGSSSGGCNLKNKSTQSLEYCAELLGLDQDDLRVSLTTRVMLTTAGGTKGTVIK
VPLKVEQANNARDALAKTVYSHLFDHVVNRVNQCFPFETSSYFIGVLDIAGFEYFEHNSFEQFCINYCNEKLQQFFNERI
LKEEQELYQKEGLGVNEVHYVDNQDCIDLIEAKLVGILDILDEENRLPQPSDQHFTSAVHQKHKDHFRLTIPRKSKLAVH
RNIRDDEGFIIRHFAGAVCYETTQFVEKNNDALHMSLESLICESRDKFIRELFESSTNNNKDTKQKAGKLSFISVGNKFK
TQLNLLLDKLRSTGASFIRCIKPNLKMTSHDFEGAQILSQLQCSGMVSVLDLMQGGF
>AGB93870.1 myosin VI, partial [Pteronotus parnellii]
APHPTDGFQMGNIVDIGPDSLTIEPLNLKGKTFLALINQVFPAEEDSKKDVEDNCSLMYLNEATLLHNIKVRYSKDRIYT
YVANILIAVNPYFDIPKIYSSETIKSYQGKSLGTMPPHVFAIADKAFRDMKVLKMSQSIIVSGESGAGKTENTKFVLRYL
TESYGTGQDIDDRIVEANPLLEAFGNAKTVRNNNSSRFGKFVEIHFNEKSSVVGGFVSHYLLEKSRICVQGKEERNYHIF
YRLCAGASEDIREKLHLSSPDNFRYLNRGCTRYFANKETDKQILQNRKSPEYLKAGSLKDPLLDDHGDFIRMCTAMKKIG
LDDEEKLDLFRVVAGVLHLGNIDFEEAGSTSGGCNLKNKSTQSLEYCAELLGLDQDDLRVSLTTRVMLTTAGGTKGTVIK
VPLKVEQANNARDALAKTVYSHLFDHVVNRVNQCFPFETSSYFIGVLDIAGFEYFEHNSFEQFCINYCNEKLQQFFNERI
LKEEQELYQKEGLGVNEVHYVDNQDCIDLIEAKLVGILDILDEENRLPQPSDQHFTSAVHQKHKDHFRLTIPRKSKLAVH
RNIRDDEGFIVRHFAGAVCYETTQFVEKNNDALHMSLESLICESRDKFIRELFESSTNNNKDTKQKAGKLSFISVGNKFK
TQLNLLLDKLRSTGASFIRCIKPNLKMTSHHFEGAQILSQLQCSGMVSVLDLMQGGF
>AGB93872.1 myosin VI, partial [Rhinolophus pusillus]
APHPTDGFQMGNIVDIGPDSLTIEPLNQKGKTFLALINQVFPAEEDSKKDVEDNCSLMYLNEATLLHNIKVRYSKDRIYT
YVANILIAVNPYFDIPKIYSSETIKSYQGKSLGTMPPHVFAIADKAFRDMKVLKMSQSIIVSGESGAGKTENTKFVLRYL
TESYGTGQDIDDRIVEANPLLEAFGNAKTVRNNNSSRFGKFVEIHFNEKSSVVGGFVSHYLLEKSRICVQGKEERNYHIF
YRLCAGASQDIQEKLHLSSPDNFRYLNRGCTRYFANKETDKQILQNRKSPEYLKAGSLKDPLLDDHGDFIRMCTAMKKIG
LDDEEKLDLFRVVAGVLHLGNIDFEEAGSTSGGCNLKNKSTQSLEYCAELLGLDQDDLRVSLTTRVMLTTAGGTKGTVIK
VPLKVEQANNARDALAKTVYSHLFDHVVNRVNQCFPFETSAYFIGVLDIAGFEYFEHNSFEQFCINYCNEKLQQFFNERI
LKEEQELYQKEGLGVNEVHYVDNQDCIDLIEAKLVGILDILDEENRLPQPSDQHFTSAVHQKHKDHFRLTIPRKSKLAIH
RNIRDDEGFIVRHFAGAVCYETTQFVEKNNDALHMSLESLICESRDKFIRELFESSTNNNKDTKQKAGKLSFISVGNKFK
TQLNLLLDKLRSTGASFIRCIKPNLKMTSHDFEGAQILSQLQCSGMVSVLDLMQGGF
>AGB93868.1 myosin VI, partial [Myotis ricketti]
APHPTDGFQMGNIVDIGPDSLTIEPLNQKGKTFLALINQVFPAEEDSKKDVEDNCSLMYLNEATLLHNIKVRYSKDRIYT
YVANILIAVNPYFDIPKIYSSETIKSYQGKSLGTMPPHVFAIADKAFRDMKVLKMSQSIIVSGESGAGKTENTKFVLRYL
TESYGTGQDIDDRIVEANPLLEAFGNAKTVRNNNSSRFGKFVEIHFNEKSSVVGGFVSHYLLEKSRICVQGKEERNYHIF
YRLCAGASEDIREKLHLSSPDNFRYLNRGCTRYFANKETDKQILQNRKSPEYLKAGSLKDPLLDDHGDFIRMCTAMKKIG
LDDEEKLDLFRVVAGVLHLGNIDFEEAGSTSGGCNLKNKSTQSLEYCAELLGLDQDDLRVSLTTRVMLTTAGGTKGTVIK
VPLKVEQANNARDALAKTVYSHLFDHVVNRVNQCFPFETSSYFIGVLDIAGFEYFEHNSYEQFCINYCNEKLQQFFNERI
LKEEQELYQKEGLGVNEVHYVDNQDCIDLVEAKLVGILDILDEENRLPQPSDQHFTSAVHQKHKDHFRLTIPRKSKLAIH
RNIRDDEGFVIRHFAGAVCYETTQFVEKNNDALHMSLESLICESRDKFIRELFETSTNNNKDTKQKAGKLGFISVGNKFK
TQLNLLLDKLRSTGASFIRCIKPNLKMTSHDFEGAQILSQLQCSGMVSVLDLMQGGF
>AGB93866.1 myosin VI, partial [Megaderma lyra]
APHPTDGFQMGNIVDIGPDSLTIEPLNQKGKTFLALINQVFPAEEDSKKDVEDNCSLMYLNEATLLHNIKVRYSKDRIYT
YVANILIAVNPYFDIPKIYSSETIKSYQGKSLGTMPPHVFAIADKAFRDMKVLKMSQSIIVSGESGAGKTENTKFVLRYL
TESYGTGQDIDDRIVEANPLLEAFGNAKTVRNNNSSRFGKFVEIHFNEKSSVVGGFVSHYLLEKSRICVQGKEERNYHIF
YRLCAGASEDIQEKLHLSSPDNFRYLNRGCTRYFATKETDKQILQNRKSPEYLKAGSLKDPLLDDHGDFIRMCTAMKKIG
LDDDEKLDLFRVVAGVLHLGNIDFEEAGSSSGGCNLKNKSTQSLEYCAELLGLDQDDLRVSLTTRVMLTTAGGTKGTVIK
VPLKVEQANNARDALAKTVYSHLFDHVVNRVNQCFPFETSSYFIGVLDIAGFEYFEHNSFEQFCINYCNEKLQQFFNERI
LKEEQELYQKEGLGVNEVHYVDNQDCIDLIEAKLVGILDILDEENRLPQPSDQHFTSAVHQKHKDHFRLTIPRKSKLAVH
RNIRDDEGFIIRHFAGAVCYETTQFVEKNNDALHMSLESLICESRDKFIRELFESSTNNNKDTKQKAGKLSFISVGNKFK
TQLNLLLDKLRSTGASFIRCIKPNLKMTSHHFEGAQILSQLQCSGMVSVLDLMQGGF
>AGB93863.1 myosin VI, partial [Hipposideros armiger]
APHPTDGFQMGNIVDIGPDSLTIEPLNQKGKTFLALINQVFPAEEDSKKDVEDNCSLMYLNEATLLHNIKVRYSKDRIYT
YVANILIAVNPYFDIPKIYSSETIKSYQGKSLGTMPPHVFAIADKAFRDMKVLKMSQSIIVSGESGAGKTENTKFVLRYL
TESYGTGQDIDDRIVEANPLLEAFGNAKTVRNNNSSRFGKFVEIHFNEKSSVVGGFVSHYLLEKSRICVQGKEERNYHIF
YRLCAGASQDIQEKLHLSSPDNFRYLNRGCTRYFANKETDKQILQNRKSPEYLKAGSLKDPLLDDHGDFIRMCTAMKKIG
LDDEEKLDLFRVVAGVLHLGNIDFEEAGSSSGGCNLKNKSTQSLEYCAELLGLDQDDLRVSLTTRVMLTTAGGTKGTVIK
VPLKVEQANNARDALAKTVYSHLFDHVVNRVNQCFPFETSAYFIGVLDIAGFEYFEHNSFEQFCINYCNEKLQQFFNERI
LKEEQELYQKEGLGVNEVHYVDNQDCIDLVEAKLVGILDILDEENRLPQPSDQHFTSAVHQKHRDHFRLTIPRKSKLAVH
RNIRDDEGFIIRHFAGAVCYETTQFVEKNNDALHMSLESLICESRDKFIRELFESSTNNNKDTKQKAGKLSFISVGNKFK
TQLNLLLDKLRSTGASFIRCIKPNLKMTSHDFEGAQILSQLQCSGMVSVLDLMQGGF
>EGW01186.1 Myosin-VI [Cricetulus griseus]
EDGKPVWAPHPTDGFQMGNIVDIGPDSLTIEPLNQKGKTFLALINQVFPAEEDSKKDVEDNCSLMYLNEATLLHNVKVRY
SKDRIYTYVANILIAVNPYFDIPKIYTSDTIKSYQGKSLGTMPPHVFAIADKAFRDMKVLKMSQSIIVSGESGAGKTENT
KFVLRYLTESYGTGQDIDDRIVEANPLLEAFGNAKTVRNNNSSRFGKFVEIHFNEKSSVVGGFVSHYLLEKSRICVQGKE
ERNYHIFYRLCAGASEDIREKLHLSSPDNFRYLNRGCTRYFANKETDKQILQNRKSPEYVKAGSLKDPLLDDHGDFIRMC
TAMKKIGLDDEEKLDLFRVVAGVLHLGNIDFEEAGSTSGGCNLKNKSAPSLEYCAELLGLDQDDLRVSLTTRVMLTTAGG
TKGTVIKVPLKVEQANNARDALAKTVYSHLFDHVVNRVNQCFPFETSSYFIGVLDIAGFEYFEHNSFEQFCINYCNEKLQ
QFFNERILKEEQELYQKEGLGVNEVHYVDNQDCIDLIEVKLVGILDILDEENRLPQPSDQHFTSVVHQKHKDHFRLTIPR
KSKLAVHRNLRDDEGFIIRHFAGAVCYETTQFVEKNNDALHMSLESLICESRDKFIRALFESSTNNNKDTKQKAGKLSFI
SVGNKFKTQLNLLLDKLRSTGASFIRCIKPNLKMTSHHFEGTQILSQLQCSGMVSVLDLMQGGF
>AGB93860.1 myosin VI, partial [Artibeus lituratus]
APHPTNGFQMGNIVDIGPDSLTIEPLDQKGKTFLALINQVFPAEEDSKKDVEDNCSLMYLNEATLLHNIKVRYSKDRIYT
YVANILIAVNPYFDIPKIYSSETIKSYQGKSLGTMPPHVFAIADKAFRDMKVLKMSQSIIVSGESGAGKTENTKFVLRYL
TESYGTGQDIDDRIVEANPLLEAFGNAKTVRNNNSSRFGKFVEIHFNEKNSVVGGFVSHYLLEKSRICVQGKEERNYHIF
YRLCAGASEDIREKLHLSSPDNFRYLNRGCTRYFANKETDKQILQNRRSPEYLKAGSLKDPLLDDHGDFIRMCTAMKKIG
LDDEEKLDLFRVVAGVLHLGNIDFEEAGSTSGGCNLKNKSTPSLEYCAELLGLDQDDLRVSLTTRVMLTTAGGTKGTVIK
VPLKVEQANNARDALAKTVYSHLFDHVVNRVNQCFPFETSSYFIGVLDIAGFEYFEHNSFEQFCINYCNEKLQQFFNERI
LKEEQELYQKEGLGVNEVHYVDNQDCIDLIEAKLVGILDILDEENRLPQPSDQHFTSAVHQKHKDHFRLTIPRKSKLAVH
RNIRDDEGFIVRHFAGAVCYETTQFVEKNNDALHMSLESLICESRDKFIRELFESSTNNNKDTKQKAGKLSFISVGNKFK
TQLNLLLDKLRSTGASFIRCIKPNLKMTSHHFEGAQILSQLQCSGMVSVLDLMQGGF
>AGB93869.1 myosin VI, partial [Pipistrellus abramus]
APHPTDGFQMGNIVDIGPDSLTIEPLNQKGKTFLALINQVFPAEEDSKKDVEDNCSLMYLNEATLLHNIKVRYSKDRIYT
YVANILIAVNPYFDIPKIYSSETIKSYQGKSLGTMPPHVFAIADKAFRDMKVLKMSQSIIVSGESGAGKTENTKFVLRYL
TESYGTGQDIDDRIVEANPLLEAFGNAKTVRNNNSSRFGKFVEIHFNEKSSVVGGFVSHYLLEKSRICVQGKEERNYHIF
YRLCAGASEDIREKLHLSSPDTFRYLNRGCTRYFANKETDKQILQNRKSPEYLKAGSLKDPLLDDHGDFNRMCTAMKKIG
LDDEEKLDLFRVVAGVLHLGNIDFEEAGSTSGGCNLKNKSTQSLEYCAELLGLDQDDLRVSLTTRVMLTTAGGTKGTVIK
VPLKVEQANNARDALAKTVYSHLFDHVVNRVNQCFPFETSSYFIGVLDIAGFEYFEHNSYEQFCINYCNEKLQQFFNERI
LKEEQELYQKEGLGVNEVHYVDNQDCIDLVEAKLVGILDILDEENRLPQPSDQHFTSAVHQKHKDHFRLTIPRKSKLAIH
RNIRDDEGFIIRHFAGAVCYETTQFVEKNNDALHMSLESLICESRDKFIRDLFETSTNNNKDTKQKAGKLGFISVGNKFK
TQLNLLLDKLRSTGASFIRCIKPNLKMTSHDFEGAQILSQLQCSGMVSVLDLMQGGF
>AGB93873.1 myosin VI, partial [Rousettus leschenaultii]
APHPTDGFQMGNIVDIGPDSLTIEPLNQKGKTFLALINQVFPAEEDSKKDVEDNCSLMYLNEATLLHNIKVRYSKDRIYT
YVANILIAVNPYFDIPKIYSSEAIKSYQGKSLGTMPPHVFAIADKAFRDMKVLKMSQSVIVSGESGAGKTENTKFVLRYL
TESYGTGQDIDDRIVEANPLLEAFGNAKTVRNNNSSRFGKFVEIHFNEKSSVVGGFVSHYLLEKSRICVQGKEERNYHIF
YRLCAGASEDIREKLHLSSPDNFRYLNRGCTRYFANKETDKQILQNRKTPEHLKAGSLKDPLLDDHGDFIRMCTAMKKIG
LDDDEKLDLFRVVAGVLHLGNIDFEEAGSTSGGCNLKNKSSQSLEYCAELLGLDQDDLRVSLTTRVMLTTAGGTKGTVIK
VPLKVEQANNARDALAKTVYSHLFDHVVNRVNQCFPFETSSYFIGVLDIAGFEYFEHNSFEQFCINYCNEKLQQFFNERI
LKEEQELYQKEGLGVNEVHYVDNQDCIDLVESKLVGILDILDEESRLPQPSDQHFTSAVHQKHKDHFRLTVPRKSKLAVH
RNLRDDEGFIIRHFAGAVCYETTQFVEKNNDALHMSLESLICESRDKFIRELFESSTNNNKDTKQKAGKLSFISVGNKFK
TQLNLLLDKLRSTGASFIRCIKPNLKMVGHQFEGAQILSQLQCSGMVSVLDLMQGGF
>AGB93861.1 myosin VI, partial [Cynopterus sphinx]
APHPTDGFQMGNIVDIGPDSLTIEPLNQKGKTFLALINQVFPAEEDSKKDVEDNCSLMYLNEATLLHNIKVRYSKDRIYT
YVANILIAVNPYFDIPKIYSSEAIKSYQGKSLGTMPPHVFAIADKAFRDMKVLKMSQSVIVSGESGAGKTENTKFVLRYL
TESYGTGQDIDDRIVEANPLLEAFGNAKTVRNNNSSRFGKFVEIHFNEKSSVVGGFVSHYLLEKSRICVQGKEERNYHIF
YRLCAGASEDIREKLHLSSPDNFRYLNRGCTRYFASKETDKQILQNRKTPEHLKAGSLKDPLLDDHGDFIRMCTAMKKIG
LDDDEKLDLFRVVAGVLHLGNIDFEEAGSTSGGCNLKNKSSQSLEYCAELLGLDQDDLRVSLTTRVMLTTAGGTKGTVIK
VPLKVEQANNARDALAKTVYSHLFDHVVNRVNQCFPFETSSYFIGVLDIAGFEYFEHNSFEQFCINYCNEKLQQFFNERI
LKEEQELYQKEGLGVNEVHYVDNQDCIDLVESKLVGILDILDEESRLPQPSDQHFTSAVHQKHKDHFRLTVPRKSKLAVH
RNLRDDEGFIIRHFAGAVCYETTQFVEKNNDALHMSLESLICESKDKFIRELFESSTNNNKDTKQKAGKLSFISVGNKFK
TQLNLLLDKLRSTGASFIRCIKPNLKMVGHHFEGAQILSQLQCSGMVSVLDLMQGGF
>KFO36085.1 Myosin-VI [Fukomys damarensis]
EDGKPVWAPHPTDGFQMGSIVDIGPDSLTIEPLNQKGKTFLALINQVFPAEEDSKKDVEDNCSLMYLNEATLLHNIKVRY
SKDRIYTYVANILIAVNPYFDIPKIYSSDTIKSYQGKSLGTMPPHVFAIADKAFRDMKVLRMSQSVIVSGESGAGKTENT
KFVLRYLTESYGTGQDIDDRIVEANPLLEAFGNAKTVRNNNSSRFGKFVEIHFNEKSSVVGGFVSHYLLEKSRICVQGKE
ERNYHIFYRLCAGASEDIREKLHLSSPDNFRYLNRGCTRYFANKETDKQISQNRKSPEYLKAGSLKDPLLDDHGDFIRMC
TAMKKIGLGDEEKLDLFRVVAGVLHLGNIDFEEAGSTSGGCNLKNKSTQSLEYCAELLGLDQDDLRVSLTTRVMLTTAGG
TKGTVIKVPLKVEQANNARDALAKTVYSHLFDHVVNRVNQCFPFETSSYFIGVLDIAGFEYFEHNSFEQFCINYCNEKLQ
QFFNERILKEEQELYQKEGLGVNEVHYVDNQDCIDLIEAKLVGILDILDEENRLPQPSDQHFTSAVHQKHKDHFRLTIPR
KSKLAVHRNLRDDEGFIIRHFAGAVCYETTQFVEKNNDALHMSLESLICESRDKFIRELFESSTNNNKDTKQKAGKLSFI
SVGNKFKGASFIRCIKPNLKMTSHHFEGAQILSQLQCSGMVSVLDLMQGGF
>KFO79027.1 Unconventional myosin-VI [Cuculus canorus]
EDGKPVWAPHPTDGFQMGMIVDIGTNNLTIEPLNQKGKTFQAAINQVFPAEEDSKKDVEDNCSLMYLNEATLLHNIKVRY
SKDRIYTYVANILIAVNPYFDIPKLYSSDTIKKYQGRSLGTLPPHVFAIADKAFRDMKVLKMSQSIIVSGESGAGKTENT
KFVLRYLTESYGSGQDIDDRIVEANPLLEAFGNAKTVRNNNSSRFGKFVEIHFNEKNSVVGGFVSHYLLEKSRICVQGKE
ERNYHIFYRLCAGAPEDIREKLYLSSPDNFRYLNRGCTRYFANKETDKQILQNRKSPEYLKAGSLKDPLLDDHGDFNRMC
TAMKKIGLDDAEKLDLFRVVAGVLHLGNIDFEEAGSTSGGCTLKPRSQPALECCAALLGLDQEDLRGSLTTRVMLTTAGG
TKGTVIKVPLKVEQANNARDALAKTVYSHLFDHVVNRVNQCFPFETSSFFIGVLDIAGFEYFEHNSFEQFCINYCNEKLQ
QFFNERILKEEQELYQREGLGVNEVRYVDNQDCIDLIEAKLVGVLDILDEENRLPQPSDQHFTSVVHQKHKDHFRLSIPR
KSKLAVHRNIRDDEGFIIRHFAGAVCYETMQFVEKNNDALHMSLESLICESKDKFVRQLFESNTNNNKDPKQKAGKLSFI
SVGNKFKTQLNLLLEKLHSTGSSFIRCIKPNLKMTNHHFEGGQILSQLQCSGMVSVLDLMQGGF
>EOB04775.1 Myosin-VI, partial [Anas platyrhynchos]
EDGKPVWAPHPTDGFQMGVIADIGTEYLTIEPLNQKGKTFQAAINQVFPAEEDSKKDVEDNCSLMYLNEATLLHNIKVRY
SKDRIYTYVANILIAVNPYFDIPKFYTSDTIKKYQGRSLGTLPPHVFAIADKAYRDMKVLKMSQSIIVSGESGAGKTENT
KFVLRYLTESYGTGQDIDDRIVEANPLLEAFGNAKTIRNNNSSRFGKFVEIHFNEKNSVVGGFVSHYLLEKSRICVQGKE
ERNYHIFYRLCAGAPEDIREKLYLSSPDSFRYLNRGCTRYFANKETDKQILQNRKSPEYLKAGSLKDPLLDDHGDFNRMC
TAMKKIGLDDAEKLDLFRVVAGVLHLGNIDFEEAGSTSGGCTLKARSQTALECCAALLGLDEDDLRGSLTTRVMLTTAGG
AKGTVIKVPLKVEQANNARDALAKTVYSHLFDHVVNRVNQCFPFETSSFFIGVLDIAGFEYFEHNSFEQFCINYCNEKLQ
QFFNERILKEEQELYQKEGLGVNEVRYVDNQDCIDLIEAKLIGVLDILDEENRLPQPSDQHFTSVVHQKHKDHFRLSIPR
KSKLAVHRNIRDDEGFIIRHFAGAVCYETTQFVEKNNDALHMSLESLICESKDKFVRQLFESNTNNNKDPKQKAGKLSFI
SVGNKFKTQLNLLLEKLHSTGSSFIRCIKPNLKMTSHHFEGGQILSQLQCSGMVSVLDLMQGGF
>KFM05163.1 Unconventional myosin-VI [Aptenodytes forsteri]
EDGKPVWAPHPTDGFQMGMIVDIGTDNLTIEPLNQKGKTFQAAINQVFPAEEDSKKDVEDNCSLMYLNEATLLHNIKVRY
SKDRIYTYVANILIAVNPYFDIPKFYSSDTIKKYQGRSLGTLPPHVFAIADKAFRDMKVLKMSQSIIVSGESGAGKTENT
KFVLRYLTESYGTGQDIADRIVEANPLLEAFGNAKTVRNNNSSRFGKFVEIHFNEKNSVVGGFVSHYLLEKSRICVQGKE
ERNYHIFYRLCAGAPEDIREKLYLSSPDNFRYLNRGCTRYFANKETDKQILQNRKSPEYLKAGSLKDPLLDDHGDFNRMC
TAMKKIGLDDAEKLDLFRVVAGVLHLGNIDFEEAGSTSGGCTLRPRSEPALECCAALLGLDQEDLRGSLTTRVMLTTAGG
AKGTVIKVPLKVEQANNARDALAKTVYSHLFDHVVNRVNQCFPFETSSFFIGVLDIAGFEYFEHNSFEQFCINYCNEKLQ
QFFNERILKEEQELYQKEGLGVNEVRYVDNQDCIDLIEAKLIGVLDILDEENRLPQPSDQHFTSVVHQKHKDHFRLSIPR
KSKLAVHRNIRDDEGFIIRHFAGAVCYETMQFVEKNNDALHMSLESLICESKDKFVRQLFESNSNNNKDPKQKAGKLSFI
SVGNKFKTQLNLLLEKLHSTGSSFIRCIKPNLKMTNHHFEGGQILSQLQCSGMVSVLDLMQGGF
>KFP02037.1 Unconventional myosin-VI [Calypte anna]
EDGKPVWAPHPTDGFQMGMIVDIGTDNLTIEPLNQKGKTFQAAINQVFPAEEDSKKDVEDNCSLMYLNEATLLHNIKVRY
SKDRIYTYVANILIAVNPYFDIPKFYSSETIKMYQGRSLGTLPPHVFAIADKAFRDMKVLKMSQSIIVSGESGAGKTENT
KFVLRYLTESYGTGQDIDYRIVEANPLLEAFGNAKTVRNNNSSRFGKFVEIHFNEKNSVVGGFVSHYLLEKSRICVQGKE
ERNYHIFYRLCAGAPEDIREKLYLSSPDSFRYLNRGCTRFFANKETDKQIMQNRKSPEYLKEGSLKDPLLDDHGDFNRMC
TAMKKIGLDDAEKLDLFRVVAGVLHLGNIDFEEAGSTSGGCTLRPRSQPALECCAVLLGLDPEDLRGSLTTRVMLTTAGG
AKGTVIKVPLKVEQANNARDALAKTVYSHLFDHVVNRVNRCFPFESSSFFIGVLDIAGFEYFEHNSFEQFCINYCNEKLQ
QFFNERILKEEQELYQKEGLGVNEVRYVDNQDCIDLIEAKLIGVLDILDEENRLPQPSDQHFTSVVHQKHKDHFRLSIPR
KSKLAVHRNIRDDEGFIIRHFAGAVCYETMQFVEKNNDALHMSLESLLCESKDKFVRQLFESNTNNNKDPKQKAGKLSFI
SVGNKFKTQLNLLLEKLHSTGSSFIRCIKPNLKMTSHHFEGGQILSQLQCSGMVSVLDLMQGGF
>EMC90185.1 Myosin-VI [Columba livia]
EDGKPVWAPHPTDGFQMGMIVDIGTDNLTIEPLNQKGKTFQAAINQVFPAEEDSKKDVEDNCSLMYLNEATLLHNIKVRY
SKDRIYTYVANILIAVNPYFDIPKLYSSDTIKKYQGRSLGTLPPHVFAIADKAFRDMKVLKMSQSIIVSGESGAGKTENT
KFVLRYLTESYGSGQDIDDRIVEANPLLEAFGNAKTVRNNNSSRFGKFVEIHFNEKNSVVGGFVSHYLLEKSRICVQGKE
ERNYHIFYRLCAGAPEDIREKLHLSSPDNFRYLNRGCTRYFANKETDKQILQNRKSPEYLKAGSLKDPLLDDHGDFNRMC
TAMKKIGLDDAEKLDLFRVVAGVLHLGNIDFEEAGSTSEDVRMSPRSEPALECCAALLGLDPEDLRGSLTTRVMLTTAGG
AKGTVIKVPLKVEQANNARDALAKTVYSHLFDHVVNRVNQCFPFETSSFFIGVLDIAGFEYFEHNSFEQFCINYCNEKLQ
QFFNERILKEEQELYQKEGLGVNEVRYVDNQDCIDLIEAKLIGILDILDEENRLPQPSDQHFTSVVHQKHKDHFRLSVAF
LFQIPRKSKLAVHRNIRDDEGFIIRHFAGAVCYETMQFVEKNNDALHMSLESLICESKDKFVRQLFESNTNNNKDPKQKA
GKLNFISVGNKFKTQLNLLLEKLHSTGSSFIRCIKPNLKMTNHHFEGGQILSQLQCSGMVSVLDLMQGGF
>AAI21230.1 MYO6 protein, partial [Xenopus tropicalis]
DDGKPVWAPHPTDGFQLGKIVDIGPDSLTIEPLNQKGKTFLAPINQVFPAEEDTSKHVEDNCSLMYLNEATLLHNIQVRY
SKDKIYTYVANILIAVNPYFDVPKLYTSEQIKQYHGKSLGTLLPHVYAIADKAFRDMKVLKMSQSIIVSGESGAGKTENT
KFVLRYLTESYGSGQDIDERIVEANPLLEAFGNAKTVRNNNSSRFGKFVEIHFNEKNSVVGGFVSHYLLEKSRICVQGQD
ERNYHIFYRLCAGAPEDIRQKLFLCSPDTFRYLNRGCTRYFASKDTDKQILQNRKSPEYLKHGALKDPLLDDHGDFNRMC
IAMKKIGLDDTEKLDLFRVVAGVLHLGNIDFEEAGSTSGGCTLRKKSSESLQCCAKLLGLDQDDLQVSLTSRVMLTTAGG
TKGTVIKVPLKVQQAENARDALAKAIYSHLFDHVVNRVNQCFPFERSSFFIGVLDIAGFEYFEHNSFEQFCINYCNEKLQ
QFFNERILKEEQELYQKEGLGVNEVHYVDNQDCIDLIEAKLVGILDILDEENRLPQPTDQHFTSAVHQKHKNHFRLTIPR
KSKLAVHRNIRDDEGFIVRHFAGAVCYETTQFVEKNNDALHMSLESLICESKDKFVRELFESANNHKDLKQKTGKLSFIS
VGNKFKTQLNLLLEKLRSTGSSFIRCIKPNLKMTSHQFEGAQILSQLQCSGMVSVLDLMQGGF
>KFV66416.1 Unconventional myosin-VI, partial [Picoides pubescens]
EDGKPVWAPHPTDGFQMGMIVDIGPDTLTIEPLNQKGKTFQAAINQVFPAEEDSKKDVEDNCSLMYLNEATLLHNIKVRY
SKDRIYTYVANILIAVNPYFDIPKFYSSDTIKKYQGRSLGTLPPHVFAIADKAFRDMKVLKMSQSIIVSGESGAGKTENT
KFVLRYLTESYGTGQDIDYRIVEANPLLEAFGNAKTVRNNNSSRFGKFVEIHFNEKNSVVGGFVSHYLLEKSRICVQGKE
ERNYHIFYRLCAGAPEDIREKLYLSSPDSFRYLNRGCTRYFANKETDKQILQNRKSPEYLKEGSLKDPLLDDHGDFNRMC
TAMKKIGLDDAEKLDLFRVVAGVLHLGNIDFEEAGSTSGGCTVRPRSEAALECCAALLGLDREDLRGSLTTRVMLTTAGG
AKGTVIKVPLKVEQANNARDALAKTVYSHLFDHVVNRVNQCFPFESSAFFIGVLDIAGFEYFEHNSFEQFCINYCNEKLQ
QFFNERILKEEQELYQREGLGVNEVRYVDNQDCIDLIEAKFVGVLDILDEENRLPQPSDQHFTSVVHQKHKDHFRLSIPR
KSKLAVHRNIRDDEGFIIRHFAGAVCYETRQFVEKNNDALHMSLESLICESKDKFVRQLFEASTNNNRDPKQKAGKLSFI
SVGNKFKTQLNLLLEKLHSTGSSFIRCIKPNLKMTNHHFEGGQILSQLQCSGNV
>KFV88622.1 Unconventional myosin-VI [Struthio camelus australis]
DDGKPVWAPHPTEGFQMGMIVDIGTDNLTIEPLNQKGKTFQAAINQVFPAEEDSKKDVEDNCSLMYLNEATLLHNIKVRY
SKDRIYTYVANILIAVNPYFDIPKFYSSETIKKYQGRSLGTLPPHVFAVADKAFRDMKVLKMSQSIIVSGESGAGKTENT
KFVLRYLTESYGTGQDIDDRIVEANPLLEAFGNAKTVRNNNSSRFGKFVEIHFNEKNSVVGGFVSHYLLEKSRICVQGKE
ERNYHIFYRLCAGAPEDIRQKLYLSSPDNFRYLNRGCTRYFATKETDKQILQNRKSPEYLKAGSLKDPLLDDHGDFNRMC
TAMRKIGLDDAEKLDLFRVVAGVLHLGNIDFEEAGSTSGGCTLKNRSGQALECCAALLGLDAPAPGLCSQPQPCVSGRLV
PSFVGVFFFFPLLLVPLKVEQANNARDALAKTVYSHLFDHVVNRVNQCFPFETSSFFIGVLDIAGFEYFEHNSFEQFCIN
YCNEKLQQFFNERILKEEQELYQKEGLGVNEVHYVDNQDCIDLIEAKLIGVLDILDEENRLPQPSDQHFTSVVHQKHKDH
FRLSIPRKSKLAVHRNIRDDEGFIIRHFAGAVCYETTQFVEKNNDALHMSLESLICESKDKFVRQLFESNTNNNRDPKQK
AGKLSFISVGNKFKTQLNLLLEKLHSTGSSFIRCIKPNLKMTSHHFEGGQILSQLQCSGMVSVLDLMQGGF
>KGL76237.1 Unconventional myosin-VI [Tinamus guttatus]
DDGKPVWAPHPTDGFQMGMIVDIGTDNLTIEPLNQKGKTFQAAVSQVFPAEEDSKKDVEDNCSLMYLNEATLLHNIKVRY
SKDRIYTYVANILIAVNPYFDIPKFYSSETIKKYQGRSLGTLPPHVFAIADKAFRDMKVLKMSQSIIVSGESGAGKTENT
KFVLRYLTESYGTGQDIDDRIVEANPLLEAFGNAKTVRNNNSSRFGKFVEIHFNEKNSVVGGFVSHYLLEKSRICVQGKE
ERNYHIFYRLCAGAPEDIRQKLFLSSPDNFRYLKAGSLKDPLLDDHGDFNRMCTAMRKIGLDDAEKLDLFRVVAGVLHLG
NIDFEEAGSTSGGCTLKNRSGQALECCAALLGLDEDDLRGSLTTRVMLTTAGGAKGTVIKVPLKVEQANNARDALAKTVY
SHLFDHVVNRVNQCFPFETSSFFIGVLDIAGFEYFEHNSFEQFCINYCNEKLQQFFNERILKEEQELYQKEGLGVNEVHY
VDNQDCIDLIEAKLIGVLDILDEENRLPQPSDQHFTSVVHQKHKDHFRLSIPRKSKLAVHRNIRDDEGFIIRHFAGAVCY
ETTQFVEKNNDALHMSLESLICESKDKFVRQLFESNTNNNKDPKQKAGKLNFISVGNKFKTQLNLLLEKLHSTGSSFIRC
IKPNLKMTSHHFEGGQILSQLQCSGMVSVLDLMQGGF
>KKF15740.1 Unconventional myosin-VI [Larimichthys crocea]
EDGKPVWAPHPADGFQLGTIVDIGADSLTIEPLKQGKTFVAAINQVFPAEDDVNKQVEDNCSLMYLNEATLLNNVRVRYS
KDKIYTFVANILIAVNPYYDIPKLYTPETIKQYRGRSLGTLPPHVYAIADKAYRDMKVLKMSQSIIVSGESGAGKTENTK
FVLRYLTSSYGTGQDIDERIVEANPLLEAFGNAKTVRNNNSSRFGKFVEIHFNEKNAVVGGFVSHYLLEKSRICRQSPEE
RNYHIFYRLCAGATEDIRQKFHLGSPDTFRYLNRGCTRFFASKDTDKQILQNRKSPEHMKLGPLKDPLLDDHGDFNRMCV
AMKKIGLDDTEKLDLFRVVAGVLHLGNIDFEEAGSTSGGCAIKNQSSQTLEHCAELLGLDEEDLRVSLTTRVMLTTAGGA
KGTVIKVPLKVEQANNARDALAKAVYSRLFDHVVTRVNQCFPFDSSSNFIGVLDIAGFEYFEHNSFEQFCINYCNEKLQQ
FFNERILKEEQELYQKEGLGVNEVHYVDNQDCIDLVEAKLVGILDILDEENRLPQPSDQHFTDTVHNKHKDHFRLTVPRK
SKLAVHRNVRDDEGFIVRHFAGAVCYETTKFVEKNNDALHMSLECLVSESKDRFVRELFENSNNSKDVKQKAGKLSFISV
GNKFKMQLNILLDKLRSTGSSFIRCIKPNLKMISHQFEGAQILSQLQCSGMVSVLDLMQGGF
>KFP21921.1 Unconventional myosin-VI [Egretta garzetta]
EDGKPVWAPHPTDGFQMGMIVDIGTDNLTIEPLNQKGKTFQAAINQVFPAEEDSKKDVEDNCSLMYLNEATLLHNIKVRY
SKDRIYTYVANILIAVNPYFDIPKFYSSDTIKKYQGRSLGTLPPHVFAIADKAFRDMKVLKMSQSIIVSGESGAGKTENT
KFVLRYLTESYGTGQDIDDRIVEANPLLEAFGNAKTVRNNNSSRFGKFVEIHFNEKNSVVGGFVSHYLLEKSRICVQGKE
ERNYHIFYRLCAGAPEDIREKLYLSSPDNFRYLNRGCTRYFANKETDKQILQNRKSPEYLKAGSLKDPLLDDHGDFNRMC
TAMKKIGLDDAEKLDLFRVVAGVLHLGNIDFEEAGSTSGALSERSLWFPDLPVTIESDLHQSHVSASEVSSLKKYRNNYY
EVPLKVEQANNARDALAKTVYSHLFDHVVNRVNQCFPFETSSFFIGVLDIAGFEYFEHNSFEQFCINYCNEKLQQFFNER
ILKEEQELYQKEGLGVNEVRYVDNQDCIDLIEAKLIGVLDILDEENRLPQPSDQHFTSVVHQKHKDHFRLSIPRKSKLAV
HRNIRDDEGFIIRHFAGAVCYETMQFVEKNNDALHMSLESLICESKDKFVRQLFESNTNNNKDPKQKAGKLSFISVGNKF
KTQLNLLLEKLHSTGSSFIRCIKPNLKMTNHQFEGGQILSQLQCSGMVSVLDLMQGGF
>AAT92220.1 myosin VIb [Danio rerio]
DDGKPVWAPHPTDGFQLGMIVDIGADALTIEPLHQRGKTFLAPISQVFPAEDDVNKHVEDNCSLMYLNEATLLNNIRIRY
SKDMIYTFVANILIAVNPYFDIPKLYSPESIKSYQGRSLGTLPPHVYAIADKAYRDMRVLKMSQSIIVSGESGAGKTENT
KFVLRYLTTSYGTGQDIDERIVEANPLLEAFGNAKTVRNNNSSRFGKFVEIHFNEKNAVVGGFVSHYLLEKSRICMQSQE
ERNYHIFYRLCAGASEDIRNMLHLNSPDSFRYLNRGCTRYFANKDSDKQIMQNRKSPEDHKHGKVGALKDPLLDDLGDFN
RMVVAMKKIGLDDTEKLNLFRVVAGVLHLGNIDFEETGSTSGGCILKNQSSQTLEYCADLLGLDQDDLRVSLTTRVMLTT
AGGAKGTVIKVPLKVEQANNARDALAKAVYSRLFDHVVKRVNQCFPFDTSSNFIGVLDIAGFEYFEHNSFEQFCINYCNE
KLQQFFNERILKEEQELYQREGLGVNEVHYVDNQDCIDLVEAKLVGVLDILDEENRLPQPSDQHFAEAVHSKHKDHFRLT
VPRKSKLTIHRNLRDDEGFIIRHFAGAVCYETTQFVEKNNDALHMSLESLVCESKDKFVRDLFENNSNSKDSKQKAGKLS
FISVGNKFKTQLNLLLEKLRSTGSSFIRCVKPNLKMVSHQFEGAQILSQLQCSGMVSVLDLMQGGF
>ETE72834.1 Myosin-VI, partial [Ophiophagus hannah]
EDGKPVWAPHPTDGFQMGSIVDIGPDGLTIEPVNQKGKTIFAAINQVFPAEEDSKKDVEDNCSLMYLNEATLLHNIRVRY
SKDRIYTYVANILIAVNPYFDIPKLYSLDVIKKYQGKSLGTLPPHVYAIADKAFRDMKVLKMSQSIIVSGESGAGKTENT
KFVLRYLTESYGSGQDIDDRIVEANPLLEAFGNAKTVRNNNSSRFGKFVEIHFNEKNSVVGGFVSHYLLEKSRICVQGPE
ERNYHIFYRLCAGAPENIREKLYLSSPDNFRYLNRGCTRYFATKETDKQILQNRKSPEYQKSGSLKDPLLDDHGDFNRMC
TAMKKIGLNDEEKLDLFRVVAGVLHLGNIDFEEAGSTSEILLAIVDSDFSTWPQVPLKVEQANNARDALAKTVYSHLFDH
VVNRVNQCFPFETSSFFIGVLDIAGFEYFEHNSFEQFCINYCNEKLQQFFNERILKEEQELYQKEGLGVNEVHYVDNQDC
IDLIEGKLIGILDILDEENRLPQPSDQHFASVIHQKQKQHFRLSIPRKSKLAVHRNIRDDEGFIIRHFAGAVCYETTQFV
EKNNDALHMSLESLICESKDKFIRLLFESNTNNNKDTKQKAGKLSFISVGNKFKTQLNLLLEKLRSTGSSFIRCIKPNLK
MTSHQFEGAQILSQLQCSGNLVYL
>AAY63881.1 myosin VI, partial [Azumapecten farreri]
GKKVWVSHAADGFKLGRITDIGSDNISIEPFDAPGTTIHSVYGRVFPAEEYDNKDVDDNCGLMFLNEATLLHNLKIRYMK
NMIYTYTANILIALNPYYEVPDLYTNATIQKYQGKSLGTMPPHVYAIADKALRDMKVSKLSQSIIVSGESGAGKTESTKY
ILKYLTMSRGQSSGQIEQRILESNPLLEAFGNAKTMRNNNSSRFGKFIEIHFSGKDLMTLAGGFISHYLLEKSRICVQSS
NERNYHIFYRLCAGAPDDLHQKLKLLSPDQFHYLNRGCTQYFCGRQSDKAMSQSRKSKQYLKDGSLTDPVIDDVQNFKTC
DDAMKHLGFSDADRTSVYKLVAGVLHLGNISFEENHEDTKGGCKVMAGGESALDTAAGLLALEKEELRESLISRVMQTAK
GGSKGTIIKVPLKVGEASSARDALAKSIYSHLFDFIVASINKSIPFSSSVSFIGLLDIAGFEYFQVNSFEQFCINYCNEK
LQQFFNDRILKEEQLLYEKEGLNVKKIEWTDNKDCIELIEMKASGIFDLLDKESKLPQPKPDHFTMEVHNRNKKHFRLSL
PRKSKLKMHRDVRDEEGFLIRHFAGAVCYHTDQFIEKNNDSMHASLQFLIQDSKNDLLKKMFEGVKVSSGKLNFISVGSK
FRSQLVVLMEKLKATGTNFIRCIKPNLKMVDHMFEGAQILSQLECSGMNSVLDLMQQGF
>JAN42632.1 Unconventional myosin-VI [Daphnia magna]
DKQKVWVPDVHKGFILGNIVDLGAETITVLPSEQGLKEIRCPYDRVYHAEEDDNKDVDDTCSLMFLNEATFLNNVALRYK
RDQIYTYVANILIAVNPYFEIKGLYSKEAIKKYQGKSLGTLPPHVFAIVDKAFRDMRVLKQSQSIVVSGESGAGKTESTK
YILRYLCESGGLAAGPIEQKILDANPLLEAFGNAKTTRNNNSSRFGKFIEIHFTSKYTIAGGFISHYLLEKSRIVTQSKE
ERNYHFFYQLCAGANEKLKQQLQLQSPDHFHYLSQGCTQYFLSKGSEVSLDPNRKSKEHRSRGSLNDPLLDDANDFKQTD
KALSNLGLSDDEKLAIYSAVAAILHLGNIVFEDNAEDARGGCQIAKSSHQALRNASALIGVDPEELHHALLSRVMQPSKG
GIKGTVIMVPLKVFEANNARDALAKAIYSRLFDYIVQRINQSIPFQSSVHYVGVLDIAGFEYFTINSFEQFCINYCNEKL
QQFFNERILKEEQCLYEKEGLGLKKIAYVDNQDCIDLIEARTSGIFCILDEESKLPKSNHTHFTSTVHSANPNHFRLALP
RKSKLRDHREIRDDEGFLIRHFAGAVCYQTAKFIEKNNDALHASLECIIQDSHNPFLKGLFESSTSSSSQQWKGKLSFIS
VGSKFRMQLTELMEKLRSTGTNFIRCVKPNLKMVDHLFEGGQILSQLQCSGMTSVLELMQEGY
>NP_999654.1 myosin VI [Strongylocentrotus purpuratus]
DENRKVWVPHLEHGFQLGRIIDIGVDGITVQPVDSGKAVSASYDRVFPAEDDEAKVVDDNCSLMYLNEATLLNNLRLRYK
KNSIYTYVANILIAVNPYKQMGDLYTSSNIKKYQGKSLGTLPPHVFAIADKSYREMITSKQSQAIIVSGESGAGKTESTK
YILRYLTESHGQSAGIIEQRIIEANPLLEAFGNAKTVRNNNSSRFGKFMEMHFGEKHDVVGGYVSHYLLEKPRVCWQNGE
ERNYHVFYYLCAGAPDDLRTKLRIQTPDDYQYLRNGITQYFAGKESQKQVKADRQSKMYKKKGALHDIQVDDYRGYQRVV
DALRKIGLKPQEEYDILRIVACVLHLGNIAFTGNDSQEGGCGVSPDAQDSLKFVADLIKVDAKELEQSLTSRTMQARGTV
IKVPLKKEQASNARDALAKAVYSHLFDHIVSRINECFPFKTSANFIGLLDIAGFEFFTLNSYEQFCINYCNEKLQQFFNL
RVLKEEQELYERESLGVNTVNYVDNQDCIDLVELKPNGILDLLDEESKLPKASANNFTHNVHQKHKTHFRLAIPRKSKLT
AHRNLRDDEGILIKHFAGAVCYQTSEFIEKNNDALHASLEVVIRDCKDPFITSLFPKNDKEPSKGRGGQNVQKLAFDSVG
NKFKVQLNQLMEKLRSTGSSFVRCIKPNGKMVDSLFEGGQILSQLQCSGMVTVLDLMQGGF
>EHJ64330.1 myosin vi [Danaus plexippus]
DKQLIWVRDPNEGFILARLHELMGEEADVLPIDNKHTRRLVNFDDILPAGDPAVDVDDNCELMFLNEATLLNNILIRYNK
KKIYTYVANILLAVNPYEDIPDMYSSSTIKKYQGRSLGELPPHVFAIADKAFRDMKALKQSQSIIVSGESGAGKTESTKY
ILKYLCDLWAKGAGPVEQKILDANPILEAFGNAKTTRNNNSSRFGKFMEVHFSNKYQVVGGHISHYLLEKSRICTQSAEE
RNYHVFYLLCAGAPQELRSALKITKPDDYLYLKNGCTQYFTSPQSEKKINASQKSKQQQAKGGLRDPILDDVEDFQRLYQ
ALSHIGLSESEKKSVFSIVGAVLHLGNIEFEEEGGARGGCRVTPESEHALATASELLGVDAGELRMALVSRLMQSSRGGI
KGTAIMVPLKTYEACNARDALAKAVYSRLFDSIVRRINDSIPSSTSAYYIGVLDIAGFEYFQMNSFEQFCINYCNEKLQQ
FFNERILKNEQELYKREGLNVPEIRFVDNQDCIDLIESKNHGIFHYLDEESKLPKPDFGHFTNSVHKELGNQSNSRLNAP
RASRLKAHRALREHEGFLLRHFAGAVCYNTSQFIEKNNDALHASLEFLVQESKNTFVQQLFENTDNSNAKGKLNFISVGA
KFQSQLSQLMEKLKENGTNFVRCIKPNSRMEGGSCSGSLVLTQLQCSGTIAVLSLMEHGF
>ELV10825.1 Myosin-VI [Tupaia chinensis]
EDGKPVWAPHPTDGFQMGNIVDIGPDSLTIEPLNQKGKTYVANILIAVNPYFDIPKIYSSETIKSYQGKSLGTMPPHVFA
IADKAFRDMKVLKMSQSIIVSGESGAGKTENTKFVLRYLTESYGTGQDIDDRIVEANPLLEAFGNAKTVRNNNSSRFGKF
VEIHFNEKVSEIVGGFVSHYLLEKSRICVQGKEERNYHIFYRLCAGASEDIREKLHLSSPDNFRYLKAGSLKDPLLDDHG
DFIRMCTAMKKIGLDDEEKLDLFRVVAGVLHLGNIDFEEAGSTSGGCNLKSKSTQSLEYCAELLGLDQDDLRVSLTTRVM
LTTAGGTKGTVIKVPLKVEQANNARDALAKTVYSHLFDHVVNRVNQCFPFETSSYFIGVLDIAGFDLIEAKLVGILDILD
EENRLPQPSDQHFTAAVHQKHKDHFRLTIPRKSKLAVHRNIRDDEGFIIRHFAGAVCYETTQL
>NP_001287501.1 jaguar, isoform N [Drosophila melanogaster]
EDTQLVWVRDAAEGYIQGRITEIGAKEFEVTPTDRKYPKRTCHFDDIHSSCDGPQDHDDNCELMLLNEATFLDNLKTRYY
KDKIYTYVANILIAVNPYREIKELYAPDTIKKYNGRSLGELPPHVFAIADKAIRDMRVYKLSQSIIVSGESGAGKTESTK
YLLKYLCYSHDSAGPIETKILDANPVLEAFGNAKTTRNNNSSRFGKFIEVHYDAKCQVVGGYISHYLLEKSRICTQSAEE
RNYHVFYMLLAGAPQQLRDKLSLGKPDDYRYLSGCTQYFANAKTEQLIPGSQKSKNHQQKGPLKDPIIDDYQHFHNLDKA
LGRLGLSDTEKLGIYSLVAAVLHLGNIAFEEIPDDVRGGCQVSEASEQSLTITSGLLGVDQTELRTALVSRVMQSKGGGF
KGTVIMVPLKIYEASNARDALAKAIYSRLFDRIVGLINQSIPFQASNFYIGVLDIAGFEYFTVNSFEQFCINYCNEKLQK
FFNDNILKNEQELYKREGLNVPEITFTDNQDIIELIEAKSNGIFTLLDEESKLPKPSYSHFTAEVHKSWANHYRLGLPRS
SRLKAHRTLRDEEGFLVRHFAGAVCYNTEQFIEKNNDALHASLEGLVQECDNPLLQTLFPSGSSTSVRGKLNFISVGSKF
KTQLGELMEKLEQNGTNFIRCIKPNSKMIDRQFEGSLALAQLKCSGTISVLELMEHGY
>ETN65262.1 myosin vi [Anopheles darlingi]
DSTLIWARDIQDGYVQGRITEIGSTEYEVQPLNSKLPKRNCMPEDIFPSCELPSDHDDNCELLFLNEATLLDNIRNRYYK
DKIYTYVAHILIAVNPYKEINGLYSPETLKRYSGRSIGELPPHVYAIADKAIRDMRVLKMSQSIIVSGESGAGKTESTKY
LLKFLCDTSATAGPIEQKILDANPILEAFGNAKTTRNNNSSRFGKFIEVHYDRRCQVVGGHISHYLLEKSRICTQSPDER
NYHVFYLLCAGAPPALREKLGLTRPDDYRYLAGCTQYFTRPQTESRVPEAYKSRVHQTKGPLRDPVLDDFEDFRQLDEAL
GRLGLSETERVQIYSLVAAVLHLGNIRFEENPEDTKGGCRITNDSEASLIVTARLIGLDASELRQALMSRVMTSKGGGVK
GTVIMVLLKVHEANNARDALAKALYSKLFDHIVRLINQNIPFQASSYYIGVLDIAGFEYFTVNSFEQFCINYCNEKLQKF
FNDNILAAEQVLYAREGLNVREIKYTDNQDIIDLIEAKANGIFNLLDEESKLPRPSYSHFTSEVHSAWNGHYRLSLPRAS
RLKTHRSLRDDEGFLIRHFAGAVCYNTNQFIEKNNDALHASLEGLVQESENALLNALFSAGKPGSPPNVGKLSFISVGSK
FKSQLGELLEKLRNNGTNFIRCIKPNNRMTDHSFEGGLALAQLKYSGTNSVLELMEYGY
>XP_003144604.1 myosin VI [Loa loa]
VWAPDPEDGFKLCKLRDIGRETMSVEPIDGGSVISARYDEIFPAEEDQKKNVDDNCSLMYSNEGTLLNNCRLRYAQKQIY
TYVGNILISINPYEQITDLYSSATIQKYQGRSIGTLPPHVFAIADSAYRNMKRTKQNQSIIISGESGAGKTESQKYILRY
LCESWGSTASPIEQRLLETNPILEAFGNAKTLRNNNSSRFGKFDSIGGGFISHYLLEKSRVCHQLESERNYHIFYQLIAG
ADEQMAERLQLRPPSSFEYLKHGCTQFFSGPTTTSKIGKDRRGKQDADLHDGILDDYVDFQRLLKGLYSIDFDTQELNTI
FNVIAAILHLGDVHFVENAEDTKGGCMVEFSSKVPLHNAASLLGLDYCELKNGLTTRVMQLSKGGIRGTIIRIPLKSHEA
SAARDALAKAIYSKLFDAIVSRINKCIPFNDSTFYIGVLDIAGFEFFTWNSFEQFCINYCNEKLQNFFNDRILKQEQDLY
AKEGLNVSRIDYNDNDDCIDLFERKVNGLFDLLDEEARLPKPSPHHFTMCAHQQLKNHFRLTTPRKSKLREHREMRDNEG
LLIRHFAGSVCYQTLLFLEKNNDALHTSLELLLDSSNVPFLRTLFSTNNDKSQDENRKPFSNKLVLASVSNKFRTQLVEL
LKKLQLTNTNFVRCIKPNSKMKPGEFEGAMILSQLKCAGMTSVLKLIQKGY
>CDS41620.1 myosin vi [Echinococcus multilocularis]
DGKSCWLPDETDGYILGRVIKVNNGVATCRPISGEGHPFEIPTEGVLLVEPHNHQPDDNCALINLNEATLLENVKQRYLK
DKIYTYVANILIAVNPYYEIKGLYSRQMIETYKGMSLGTLPPHPFAIADKAFRDMKIQKESQAIIVSGESGAGKTETTKH
VLRYLTEGYGADVGVIEQRIINSNPLLEAFGNAKTMRNNNSSRFGKFIELAFDKNNAVSGGSLEHYILEKGRLVRQSSEE
RNFHFFYQLFAGAPNSLRQKLGLTTPDDFLYLSRGCTRYFLQPQNRNALSEDRLSHDHKDQGPLHDIKMDDLEDFKTSIK
VMTEMGLNETTQESIFSILAGILHLGNVVFQESLSTHGGCTITSQSQLSLNMASKLLGINAATMAKALTTRITGTLDLTI
ALRLEETSNARDGLAKVIYDRLFDLLVTSINRAIPQSKKSTYIGLLDIAGFEHFDVNSFEQFCINYCNEKLQQFFNERIL
REEQIVYQREGLNVSSVSYIDNQDCIDLIESKDFGILALLDEESRLPNSNSEHFTNEIHRCHGNNPRLTVPRRDKKFKNL
RDSEGFLLRHFAGSVCYTTTEFIAKNNDALHHSLEELLHSSSNDFLRKMHNPKEVKTWTLKKSQSNIAGKINFISVGSKF
KDQINDLITKLRSSGTNFIRCVKPNSNMADHEFEGGPCLLQLRFFGLTDVLMLMQQGY
>XP_001866229.1 myosin vi [Culex quinquefasciatus]
DSQLVWARDSQAGYIQGRITEMGAHEYEVQPEDNKHPKRNCIPEDIFPSCEAVSDHDDNCELMFLNEATLLDNIKNRYYK
DKIYTYVANILIAVNPYKEIRDLYAKTTIKRYNGKSLGELPPHVYAIADKAIRDMRVLKLSQSIIVSGESGAGKTESTKY
LLRYLCDAASAAGPIETKILDANPILEAFGNAKTTRNNNSSRFGKFIEVHYDGKCQVVGGHISHYLLEKSRICTQSPEER
NYHVFYLLCAGAPQQLRDKLLIGKPDDYRYLSGCTQYFSSAETDRKIPNSQKSKNHMAKGSLKDPILDDYNDFQDLDQAL
TRLGLSEAQKFEIYGLVAAVLHLGNVSFEDNPEDAKGGCRVATSSERAITITAKLIGLDPSELRQALVSRVMQSKGGGIK
GTVIMVPLKVYEANNARDALAKALYSRLFDHIVSLINANIPFQASSYYIGVLDIAGFEYFTVNSFEQFCINYCNEKLQKF
FNDNILAAEQDLYKREGLNVPEIKFTDNQDIIAEMEAR
>NP_199203.1 myosin 2 [Arabidopsis thaliana]
GSFVWVEDPDEAWIDGEVVQVNGDEIKVLCTSGKHVVTKISNAYPKDVEAPASGVDDMTRLAYLHEPGVLQNLHSRYDIN
EIYTYTGSILIAVNPFRRLPHLYSSHMMAQYKGASLGELSPHPFAVADAAYRQMINDGVSQSILVSGESGAGKTESTKLL
MRYLAYMGGRAAAEGRSVEQKVLESNPVLEAFGNAKTVRNNNSSRFGKFVEIQFDEKGRISGAAIRTYLLERSRVCQVSD
PERNYHCFYMLCAAPQEDVKKFKLEEPKKYHYLNQSKCLELDSINDAEEYHATRRAMDVVGISTEEQDAIFSVVAAILHI
GNIEFAKGEEIDSSIPKDDKSLFHLKTAAELLSCDEKALEDSLCKRIMVTRDETITKTLDPEAATLSRDALAKVMYSRLF
DWLVDKINSSIGQDHDSKYLIGVLDIYGFESFKTNSFEQFCINLTNEKLQQHFNQHVFKMEQEEYKKEEINWSYIEFVDN
QDILDLIEKKPGGIIALLDEACMFPRSTHETFAQKLYQTFKTHKRFTKPKLARSDFTICHYAGDVTYQTELFLDKNKDYV
IAEHQALLNSSSCSFVASLFPPMSDDSKQSKFSSIGTRFKQQLVSLLEILNTTEPHYIRCIKPNNLLKPGIFENENILQQ
LRCGGVMEAIRISCAGY
