# Supplementary figures and images for: Cryo-EM structures reveal specialization at the myosin VI-actin interface and a mechanism of force sensitivity
Source: eLife journal article supplement (doi:10.7554/elife.31125), 2017-12-04

MyoVI Rigor

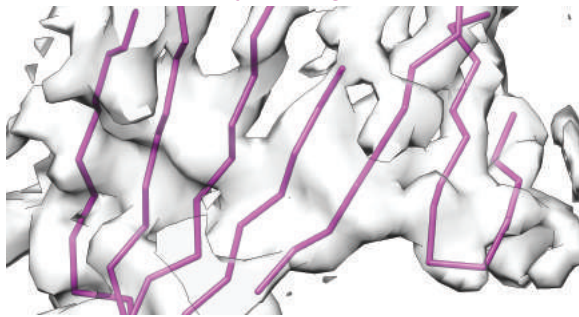

MyoVI ADP

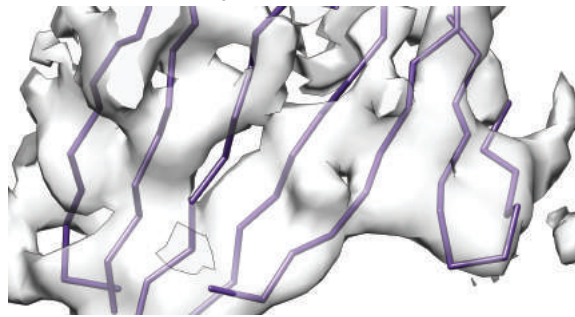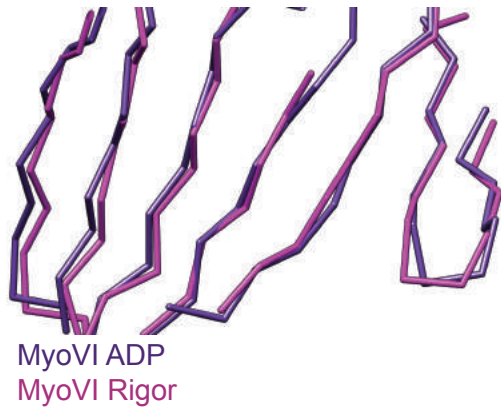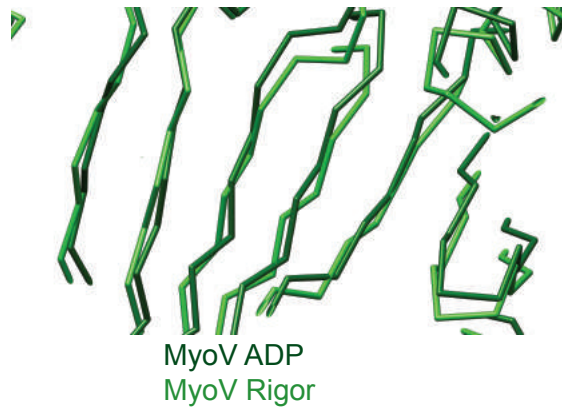

Supplement: supp [file elife-31125-supp-v1.zip]

ADP from 2BKI vs ADP from 4PFO

ADP from 2BKI vs rigor

ADP from 2BKI vs 2BKI

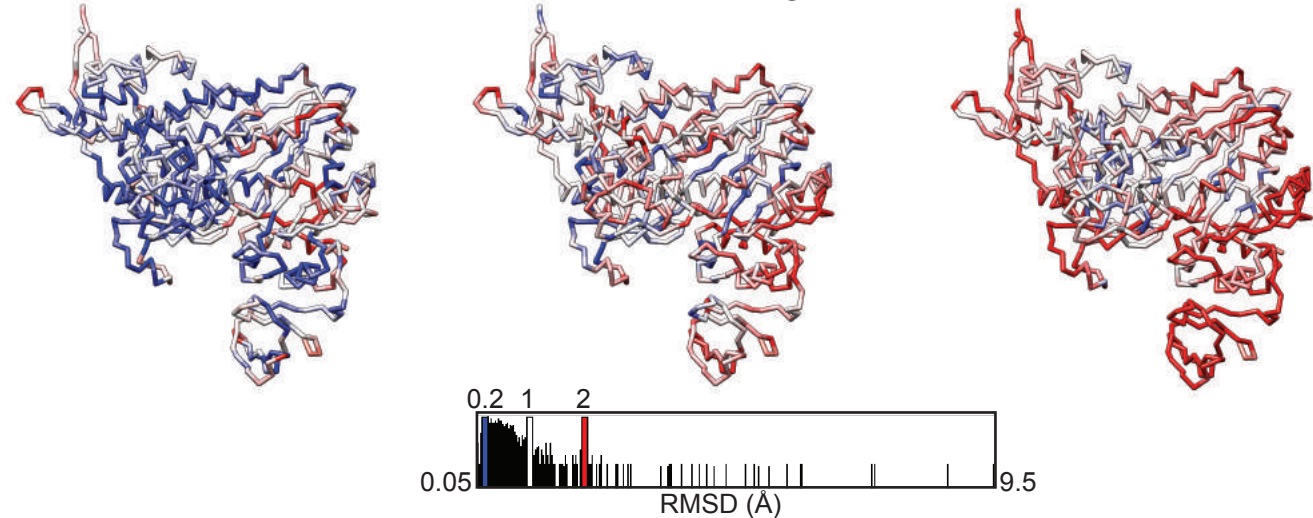

Figure 3- Figure Supplement 2

Supplement: supp [file elife-31125-supp-v1.zip]

**Actin**

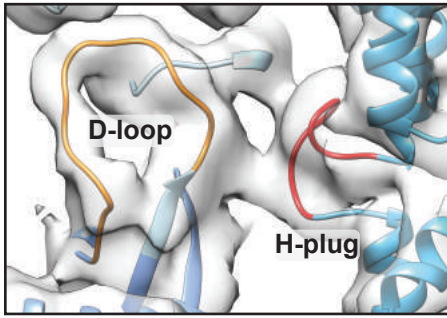

**ADP**

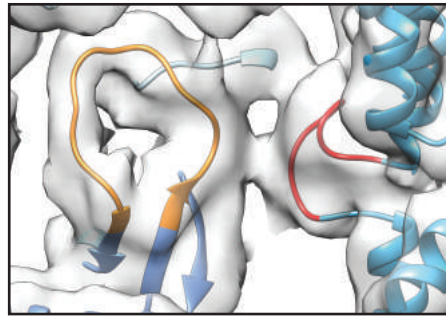

**Rigor**

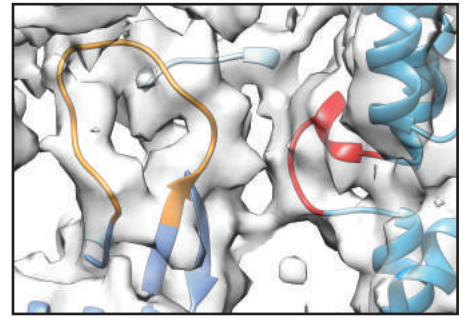

Supplement: supp [file elife-31125-supp-v1.zip]

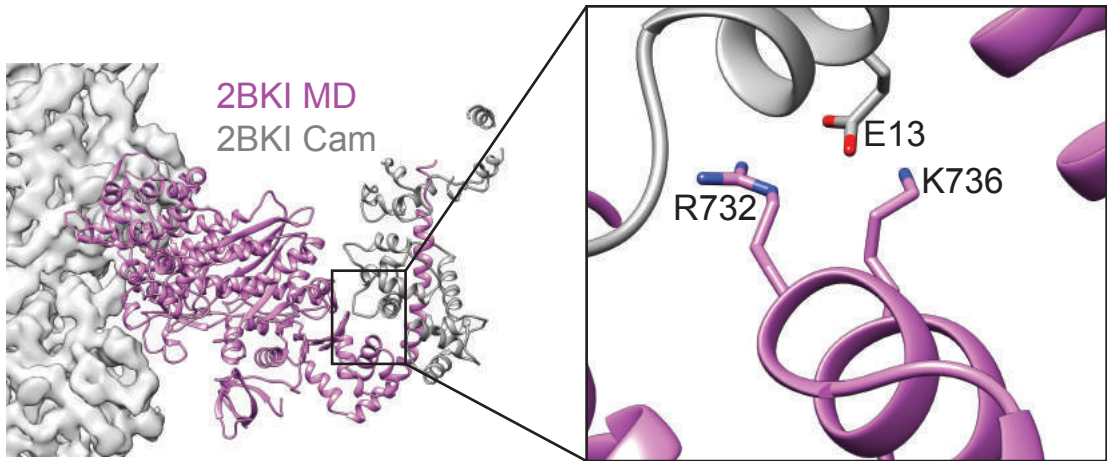

Supplement: supp [file elife-31125-supp-v1.zip]

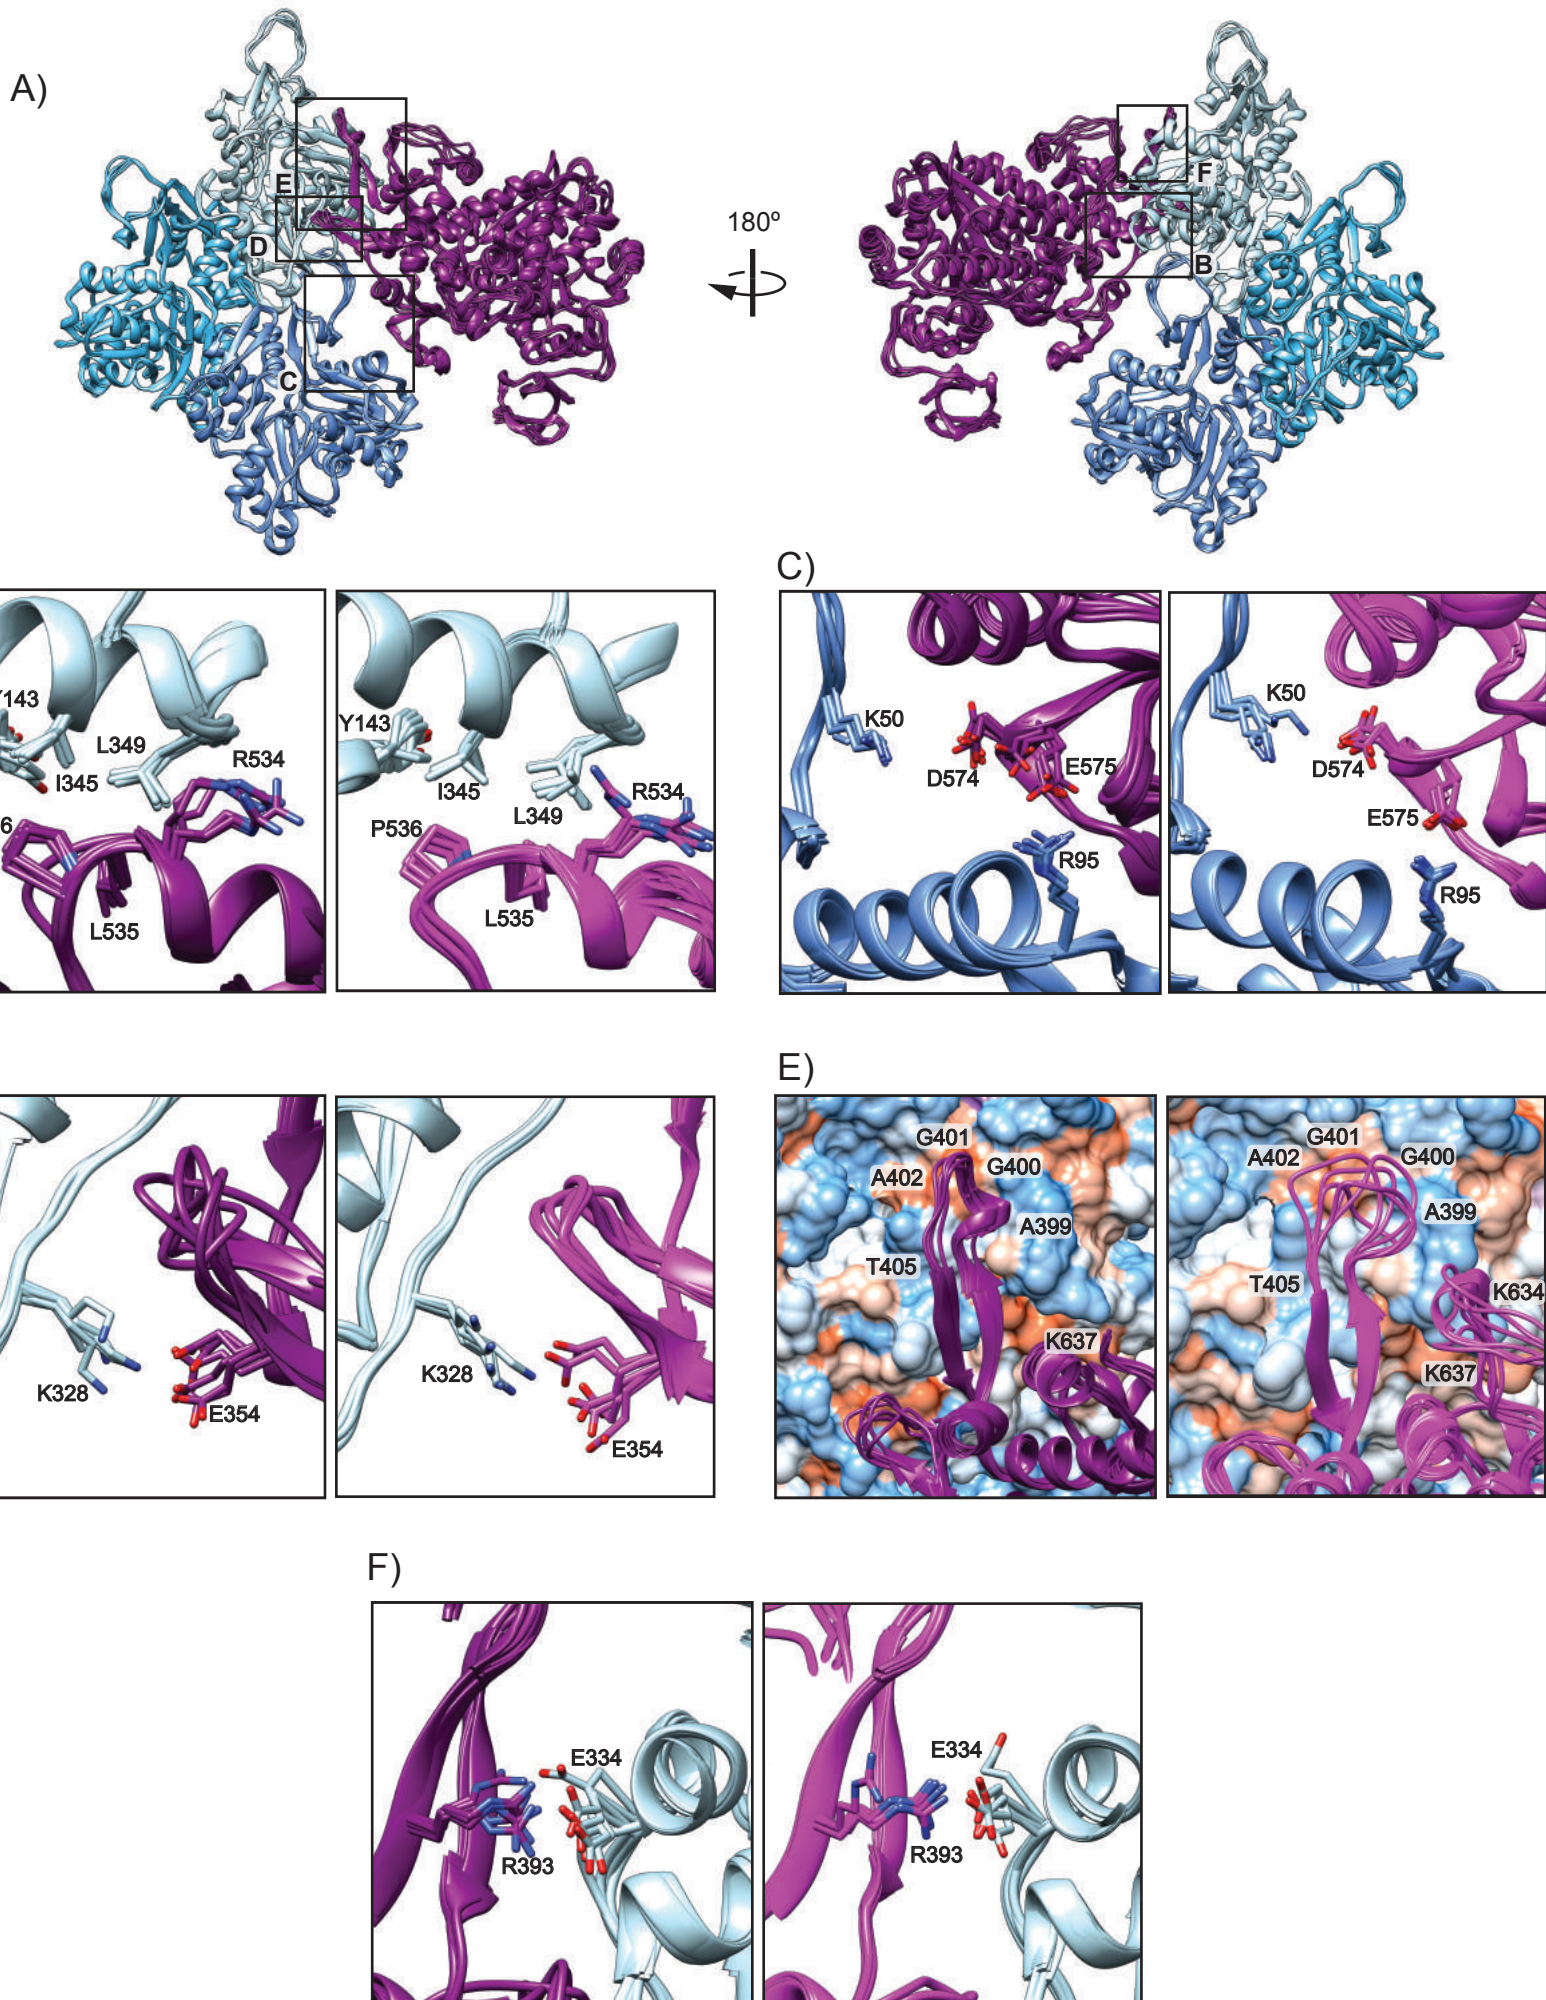

Figure 3- Figure Supplement 4

Supplement: supp [file elife-31125-supp-v1.zip]

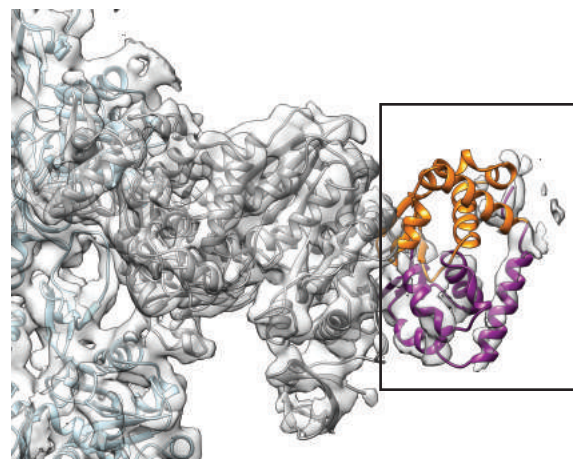

Pre-power stroke (2V26)  
CC: 0.6886

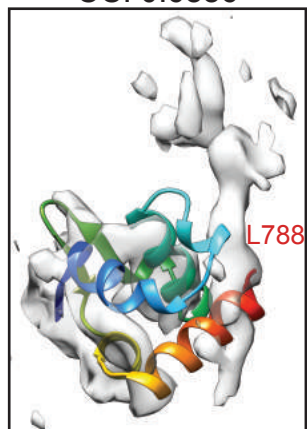

Pi Release (4PFO)  
CC: 0.9204

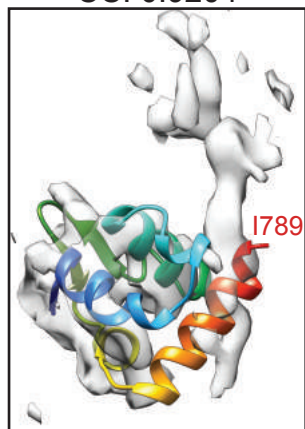

Rigor-like (2BKI)  
CC: 0.9275

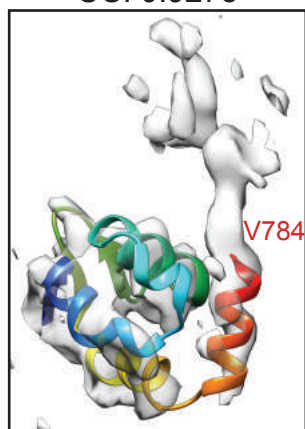

Supplement: supp [file elife-31125-supp-v1.zip]

A)

ADP

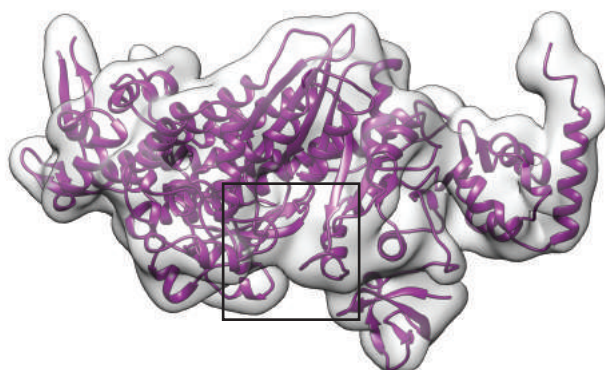

Rigor

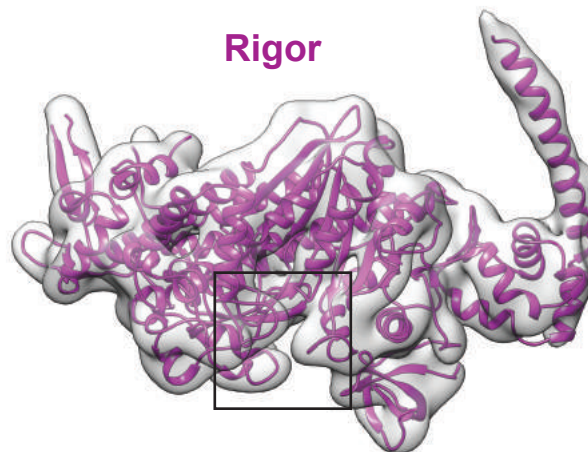

B)

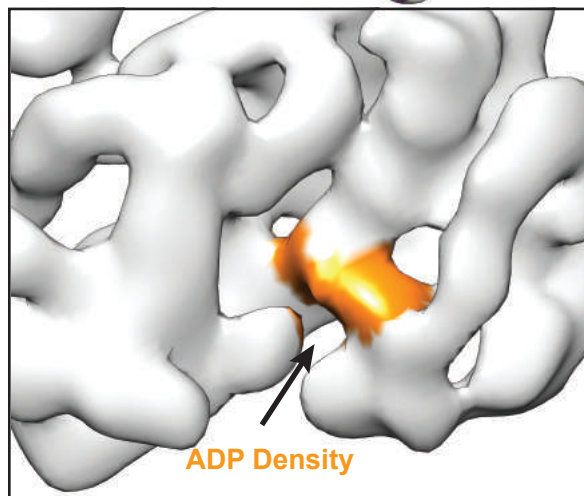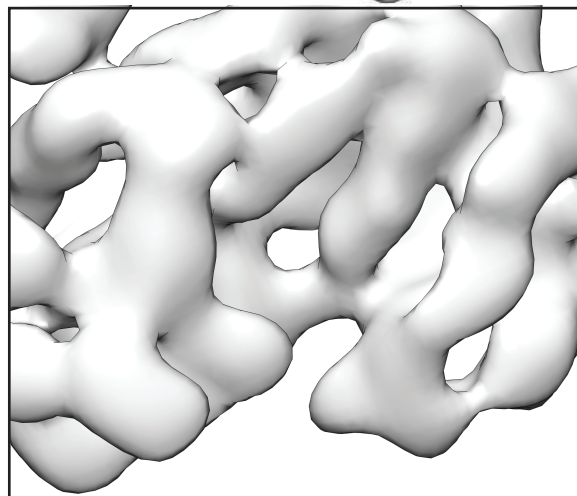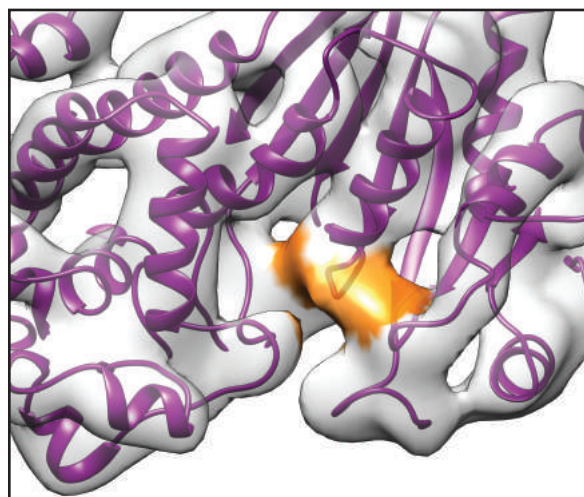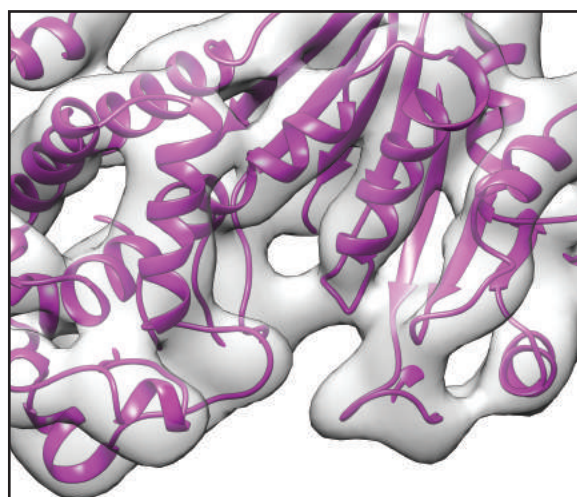

Supplement: supp [file elife-31125-supp-v1.zip]

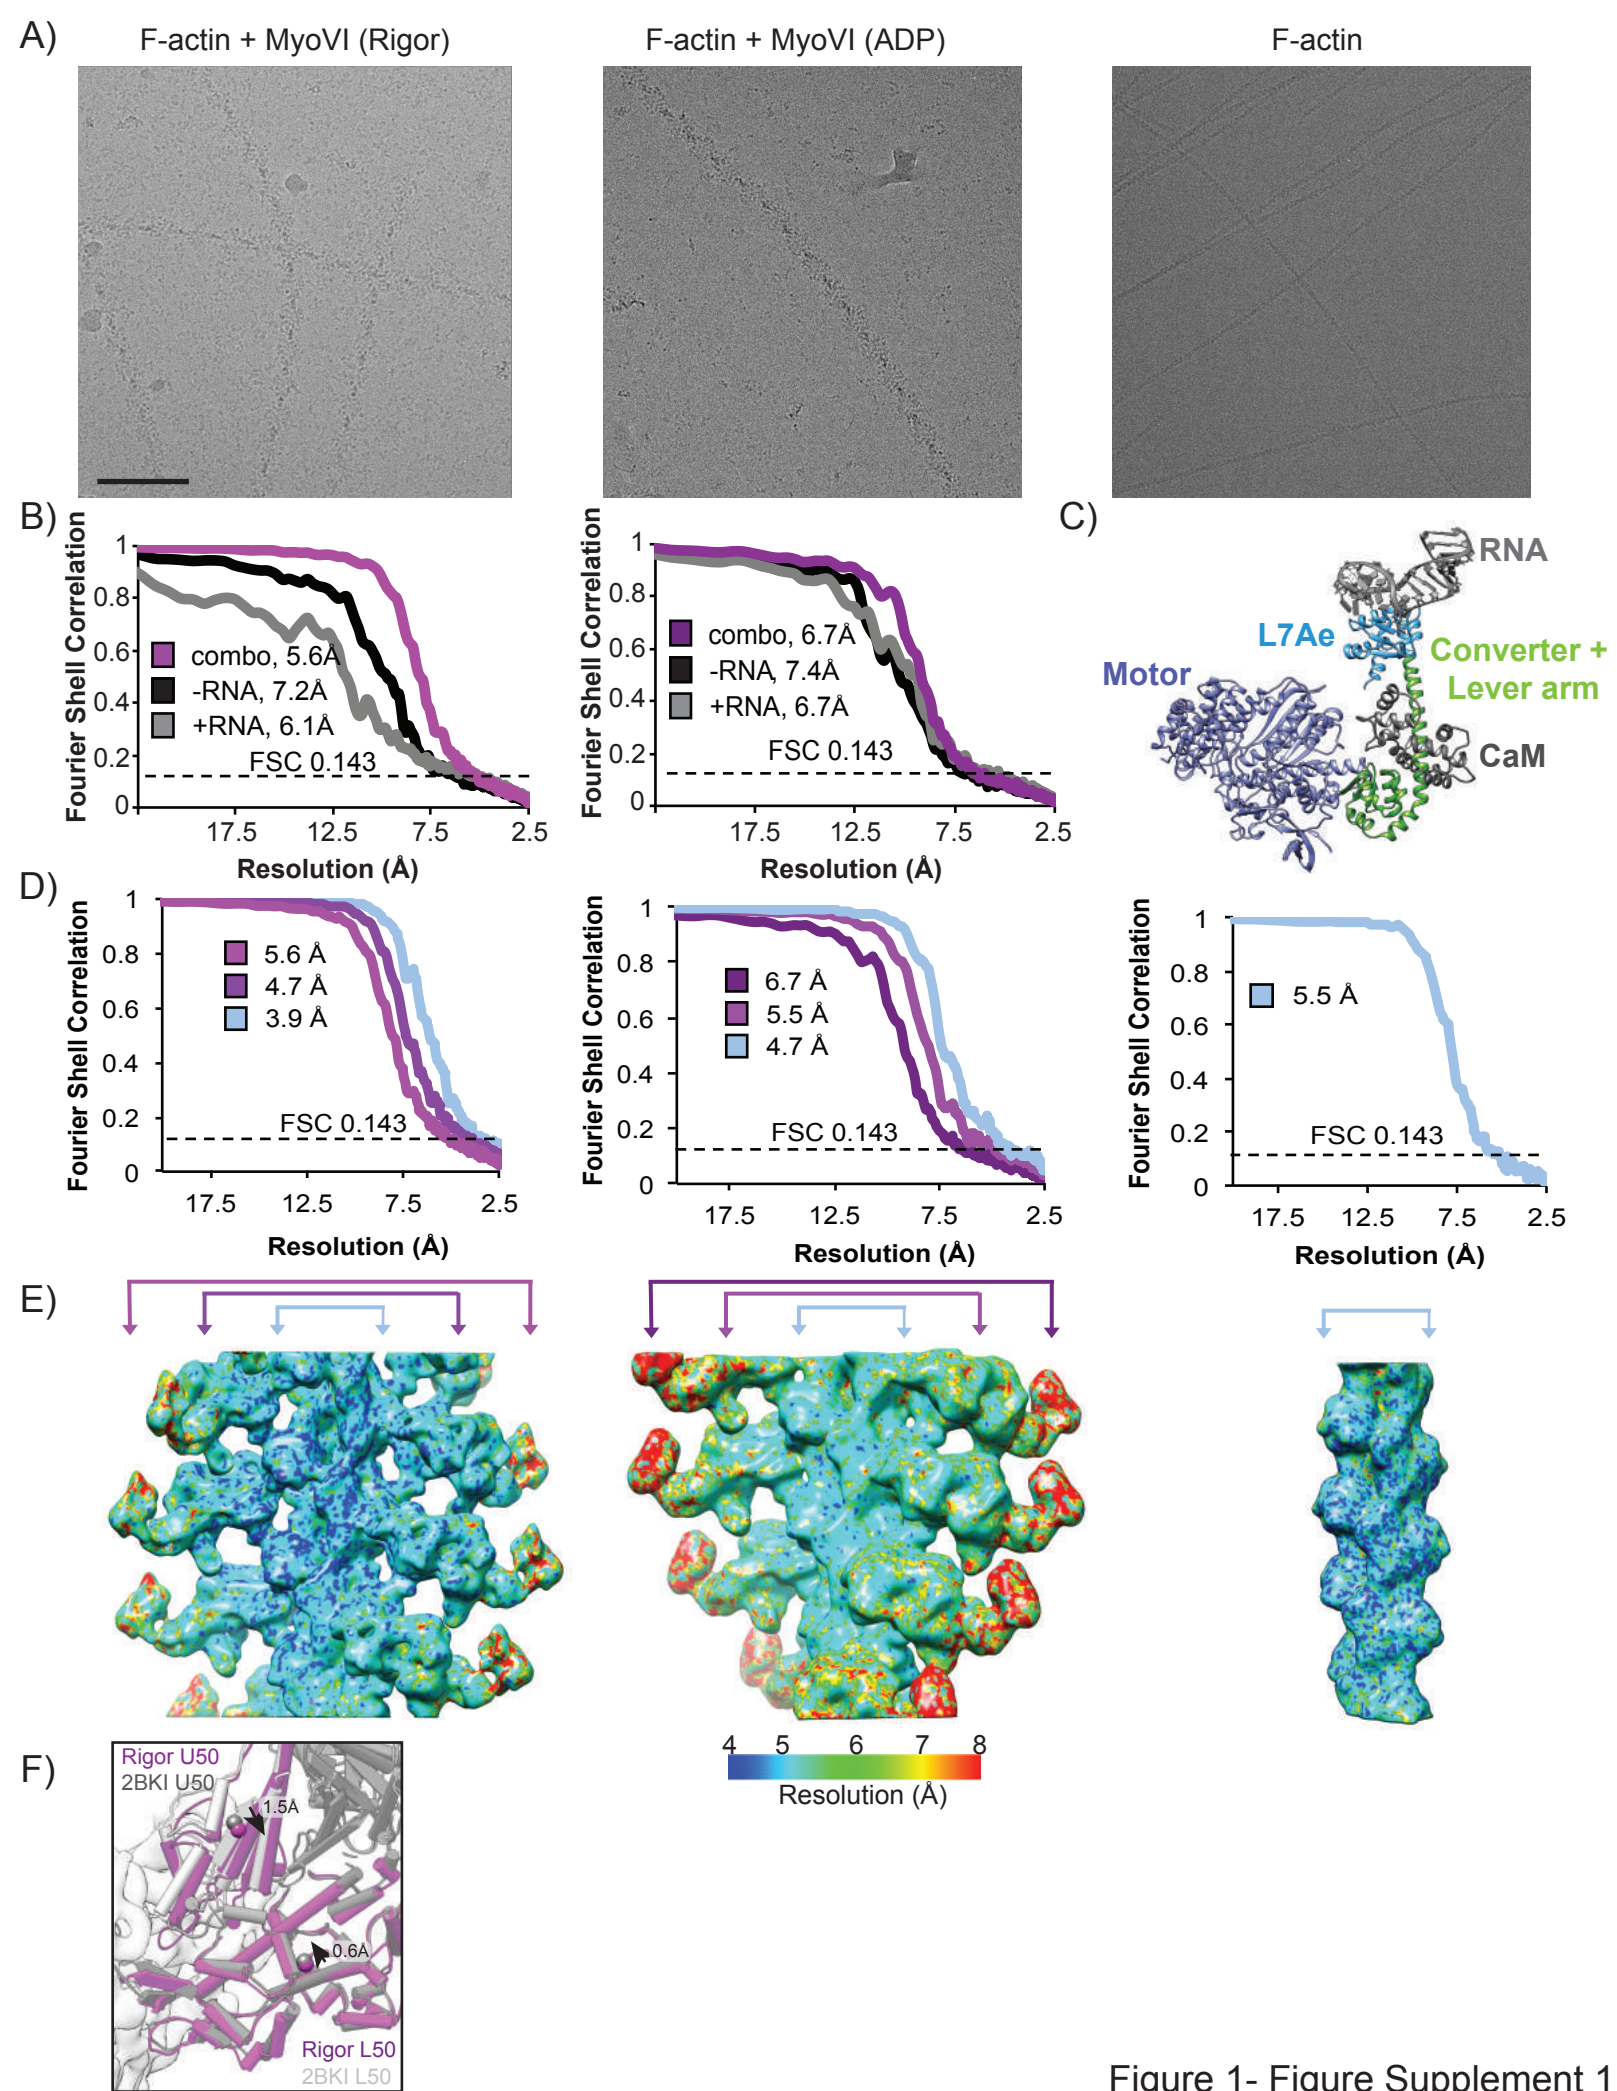

Figure 1- Figure Supplement 1

Supplement: supp [file elife-31125-supp-v1.zip]

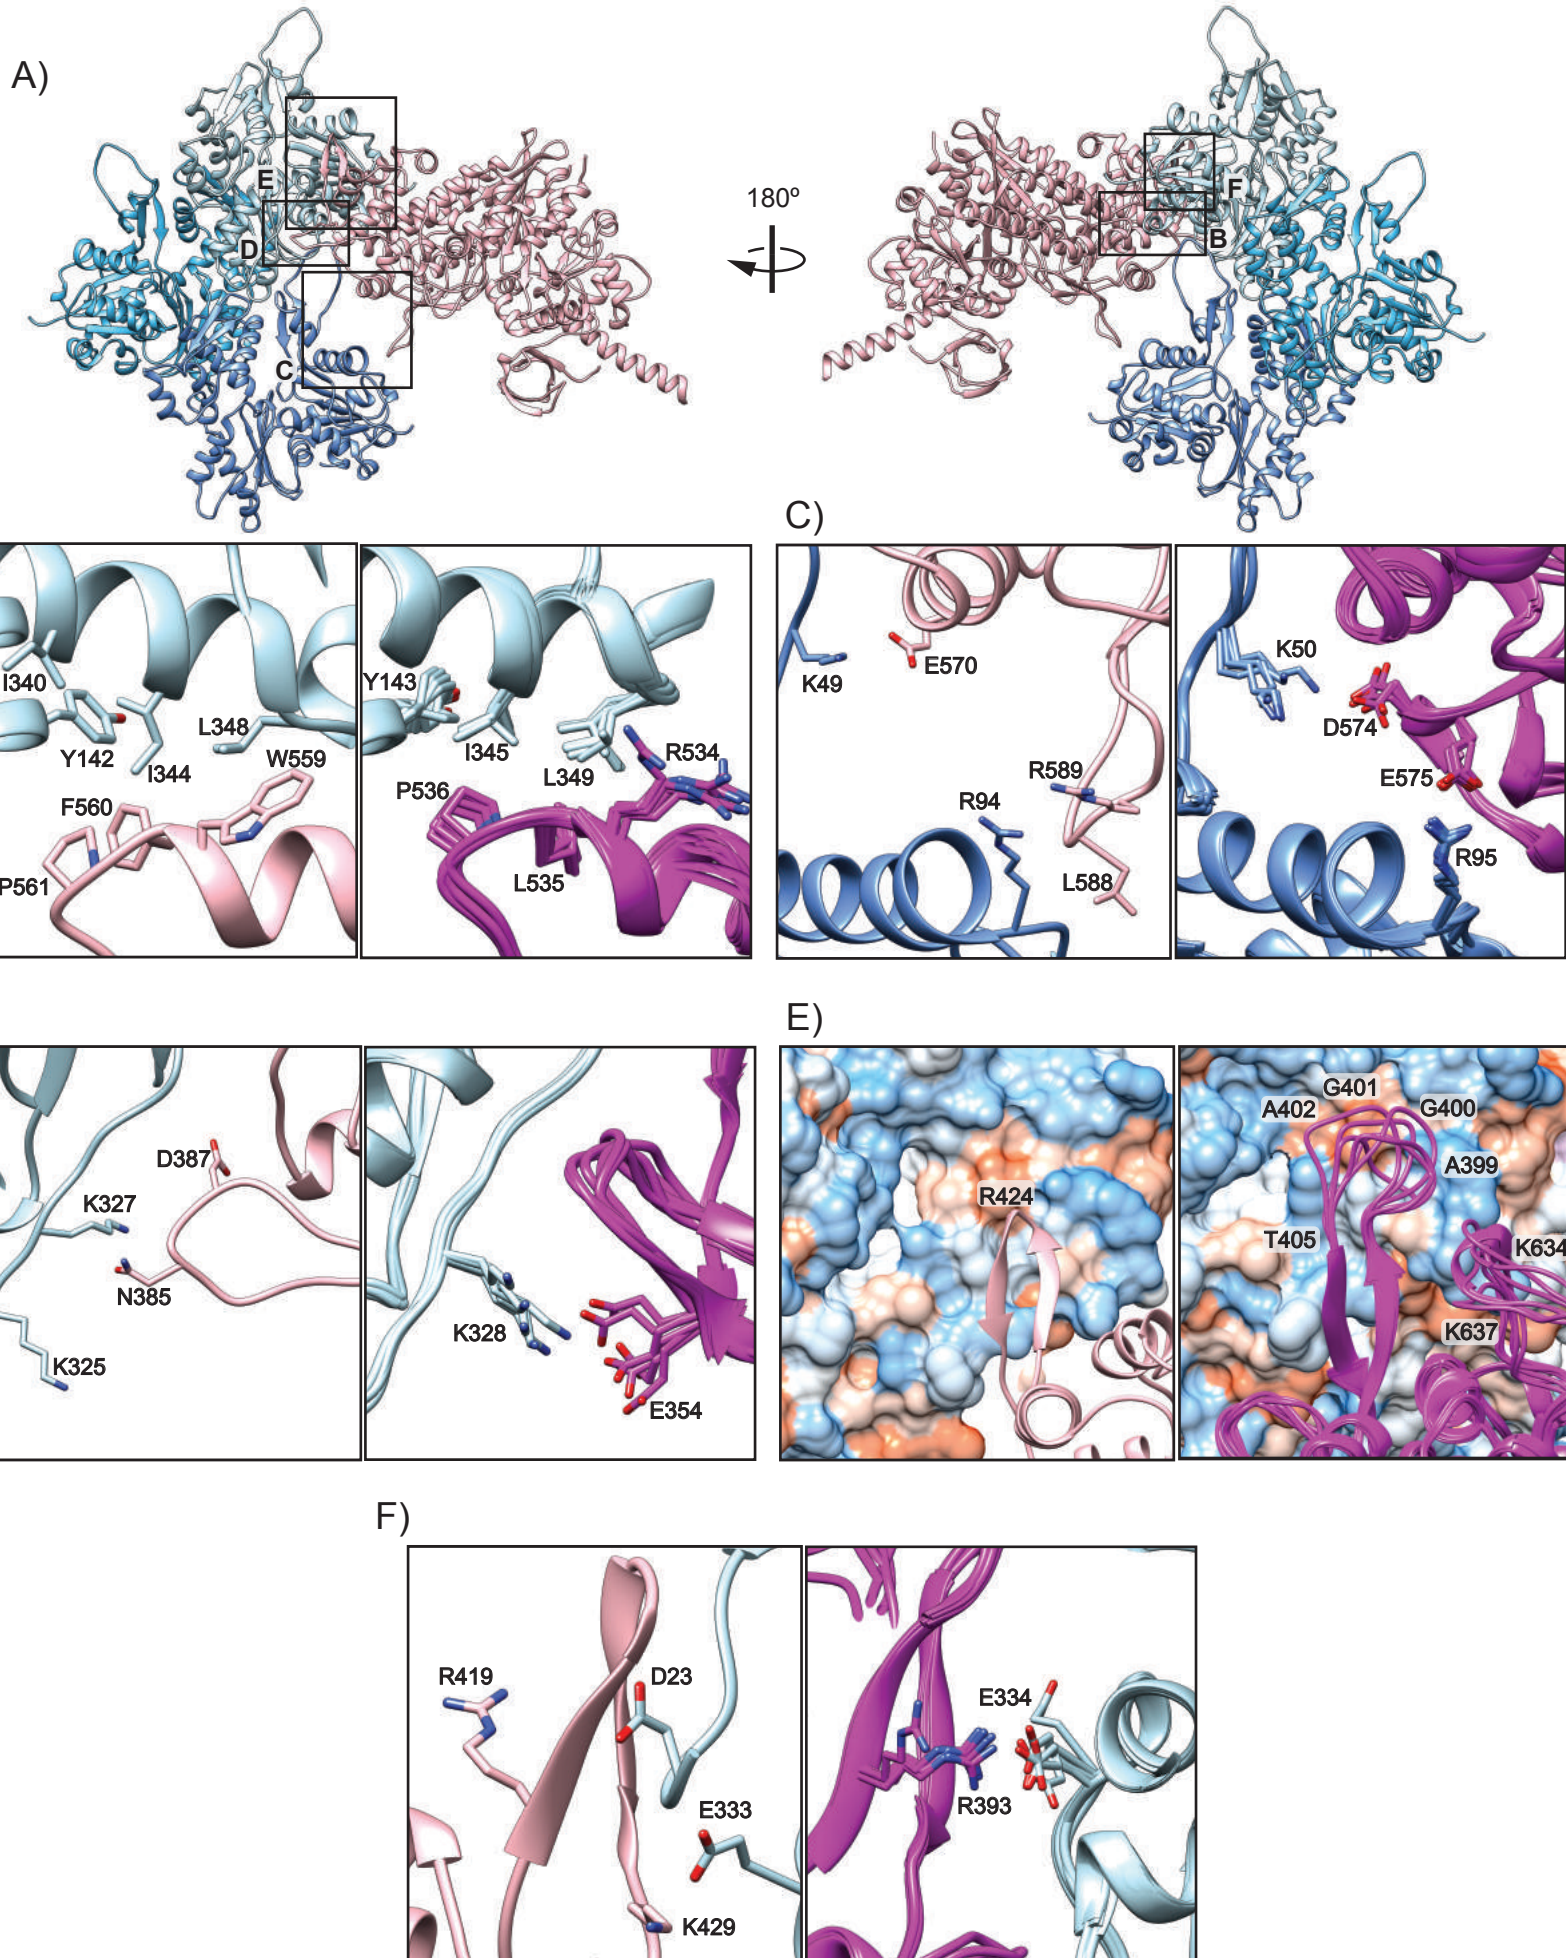

Figure 2- Figure Supplement 1

Supplement: supp [file elife-31125-supp-v1.zip]

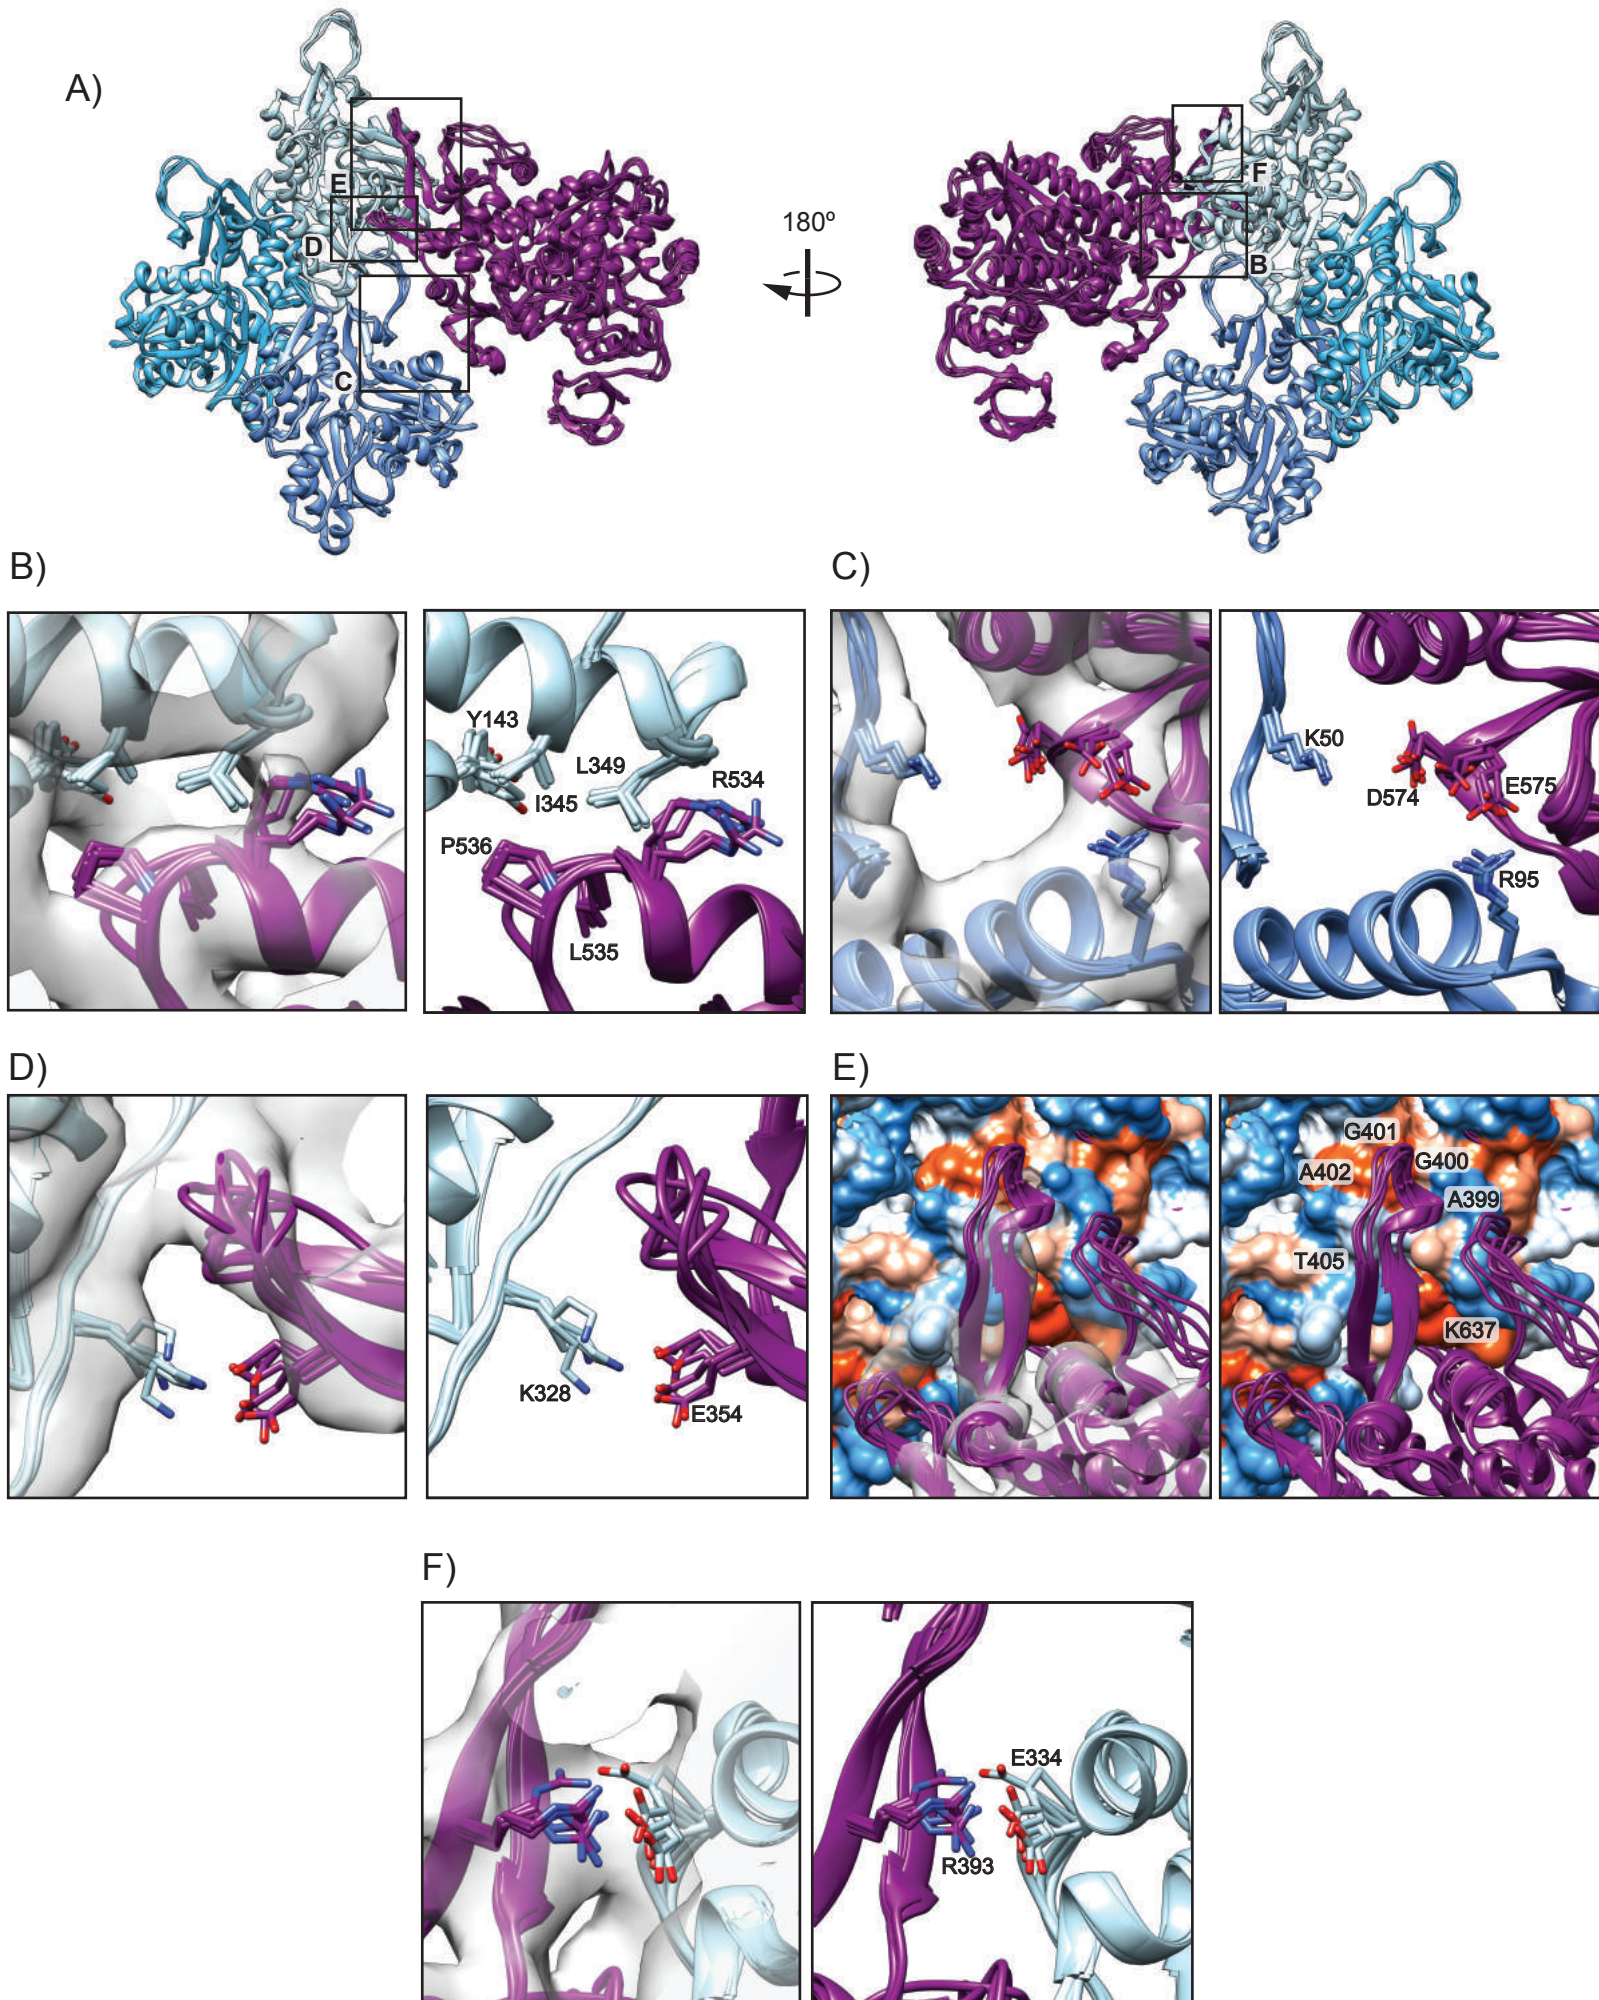

Figure 3- Figure Supplement 3

Supplement: supp [file elife-31125-supp-v1.zip]

A)

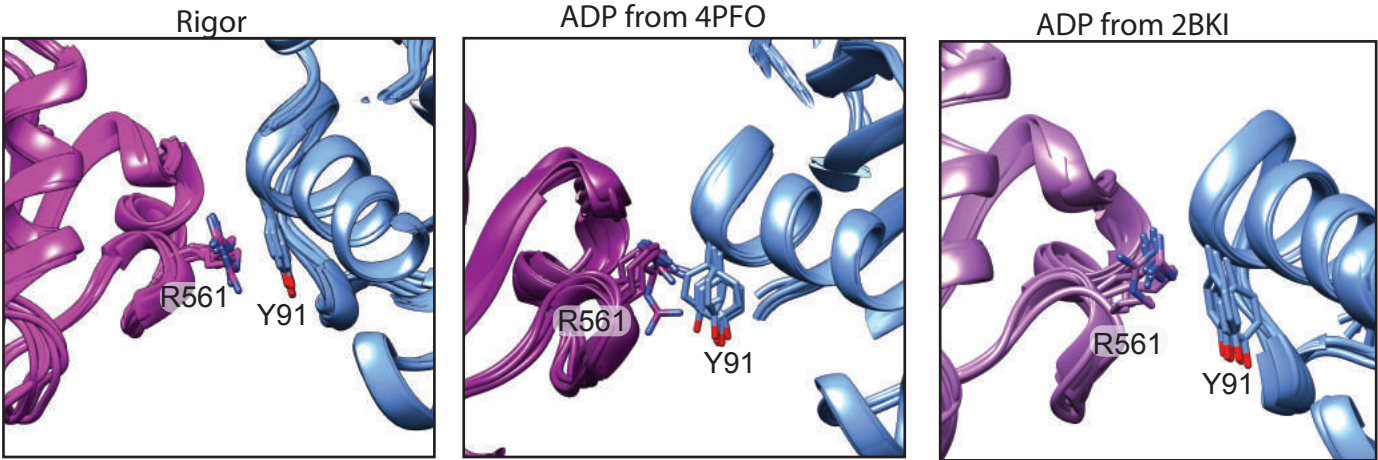

B) Myo V (Strong-bound ADP)

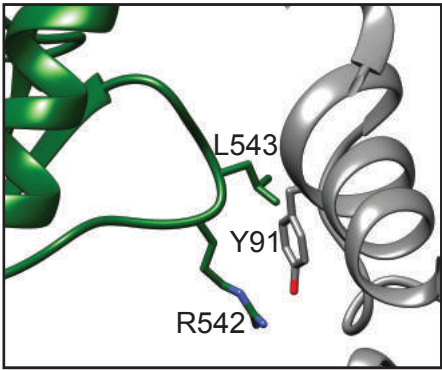

Myo V (Rigor)

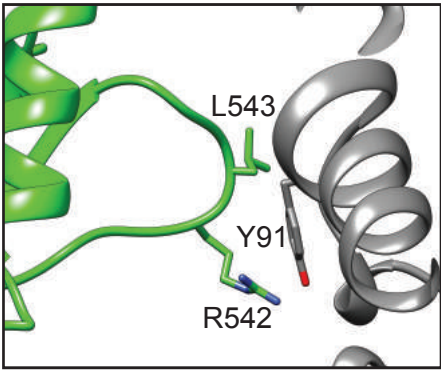

C) Myo IIC (Rigor)

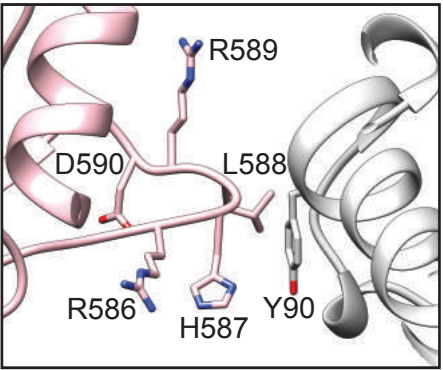

Figure 3- Figure Supplement 6

Supplement: supp [file elife-31125-supp-v1.zip]

**ADP**

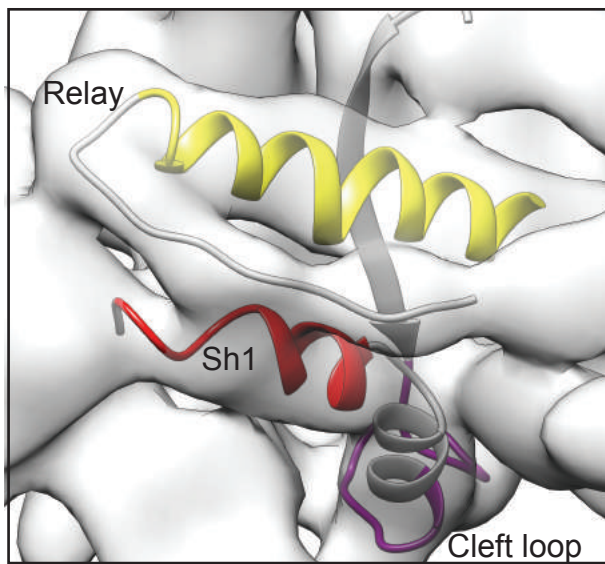

**Rigor**

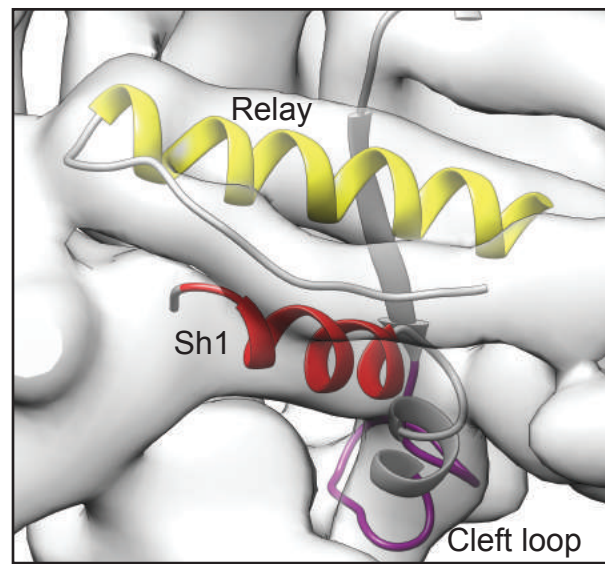

Supplement: supp [file elife-31125-supp-v1.zip › elife_poa_e31125_Figure_5_figure_supplement_2.pdf]

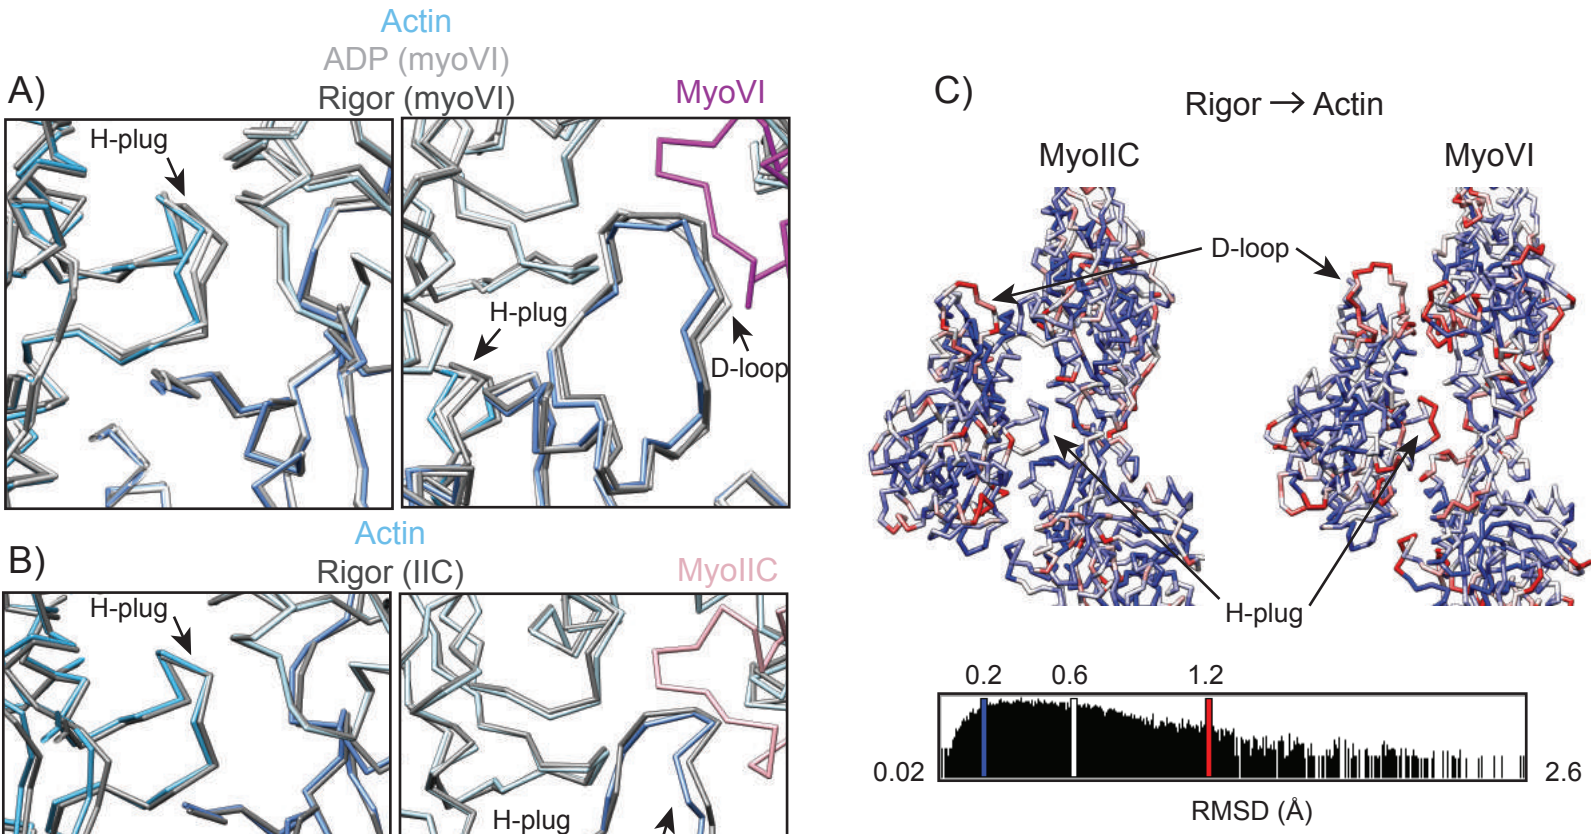

Figure 6- Figure Supplement 2

Supplement: supp [file elife-31125-supp-v1.zip › elife_poa_e31125_Figure_6_figure_supplement_2.pdf]
